# Supplementary figures and images for: CtIP forms a tetrameric dumbbell-shaped particle which bridges complex DNA end structures for double-strand break repair
Source: eLife journal article supplement (doi:10.7554/elife.42129), 2019-01-02

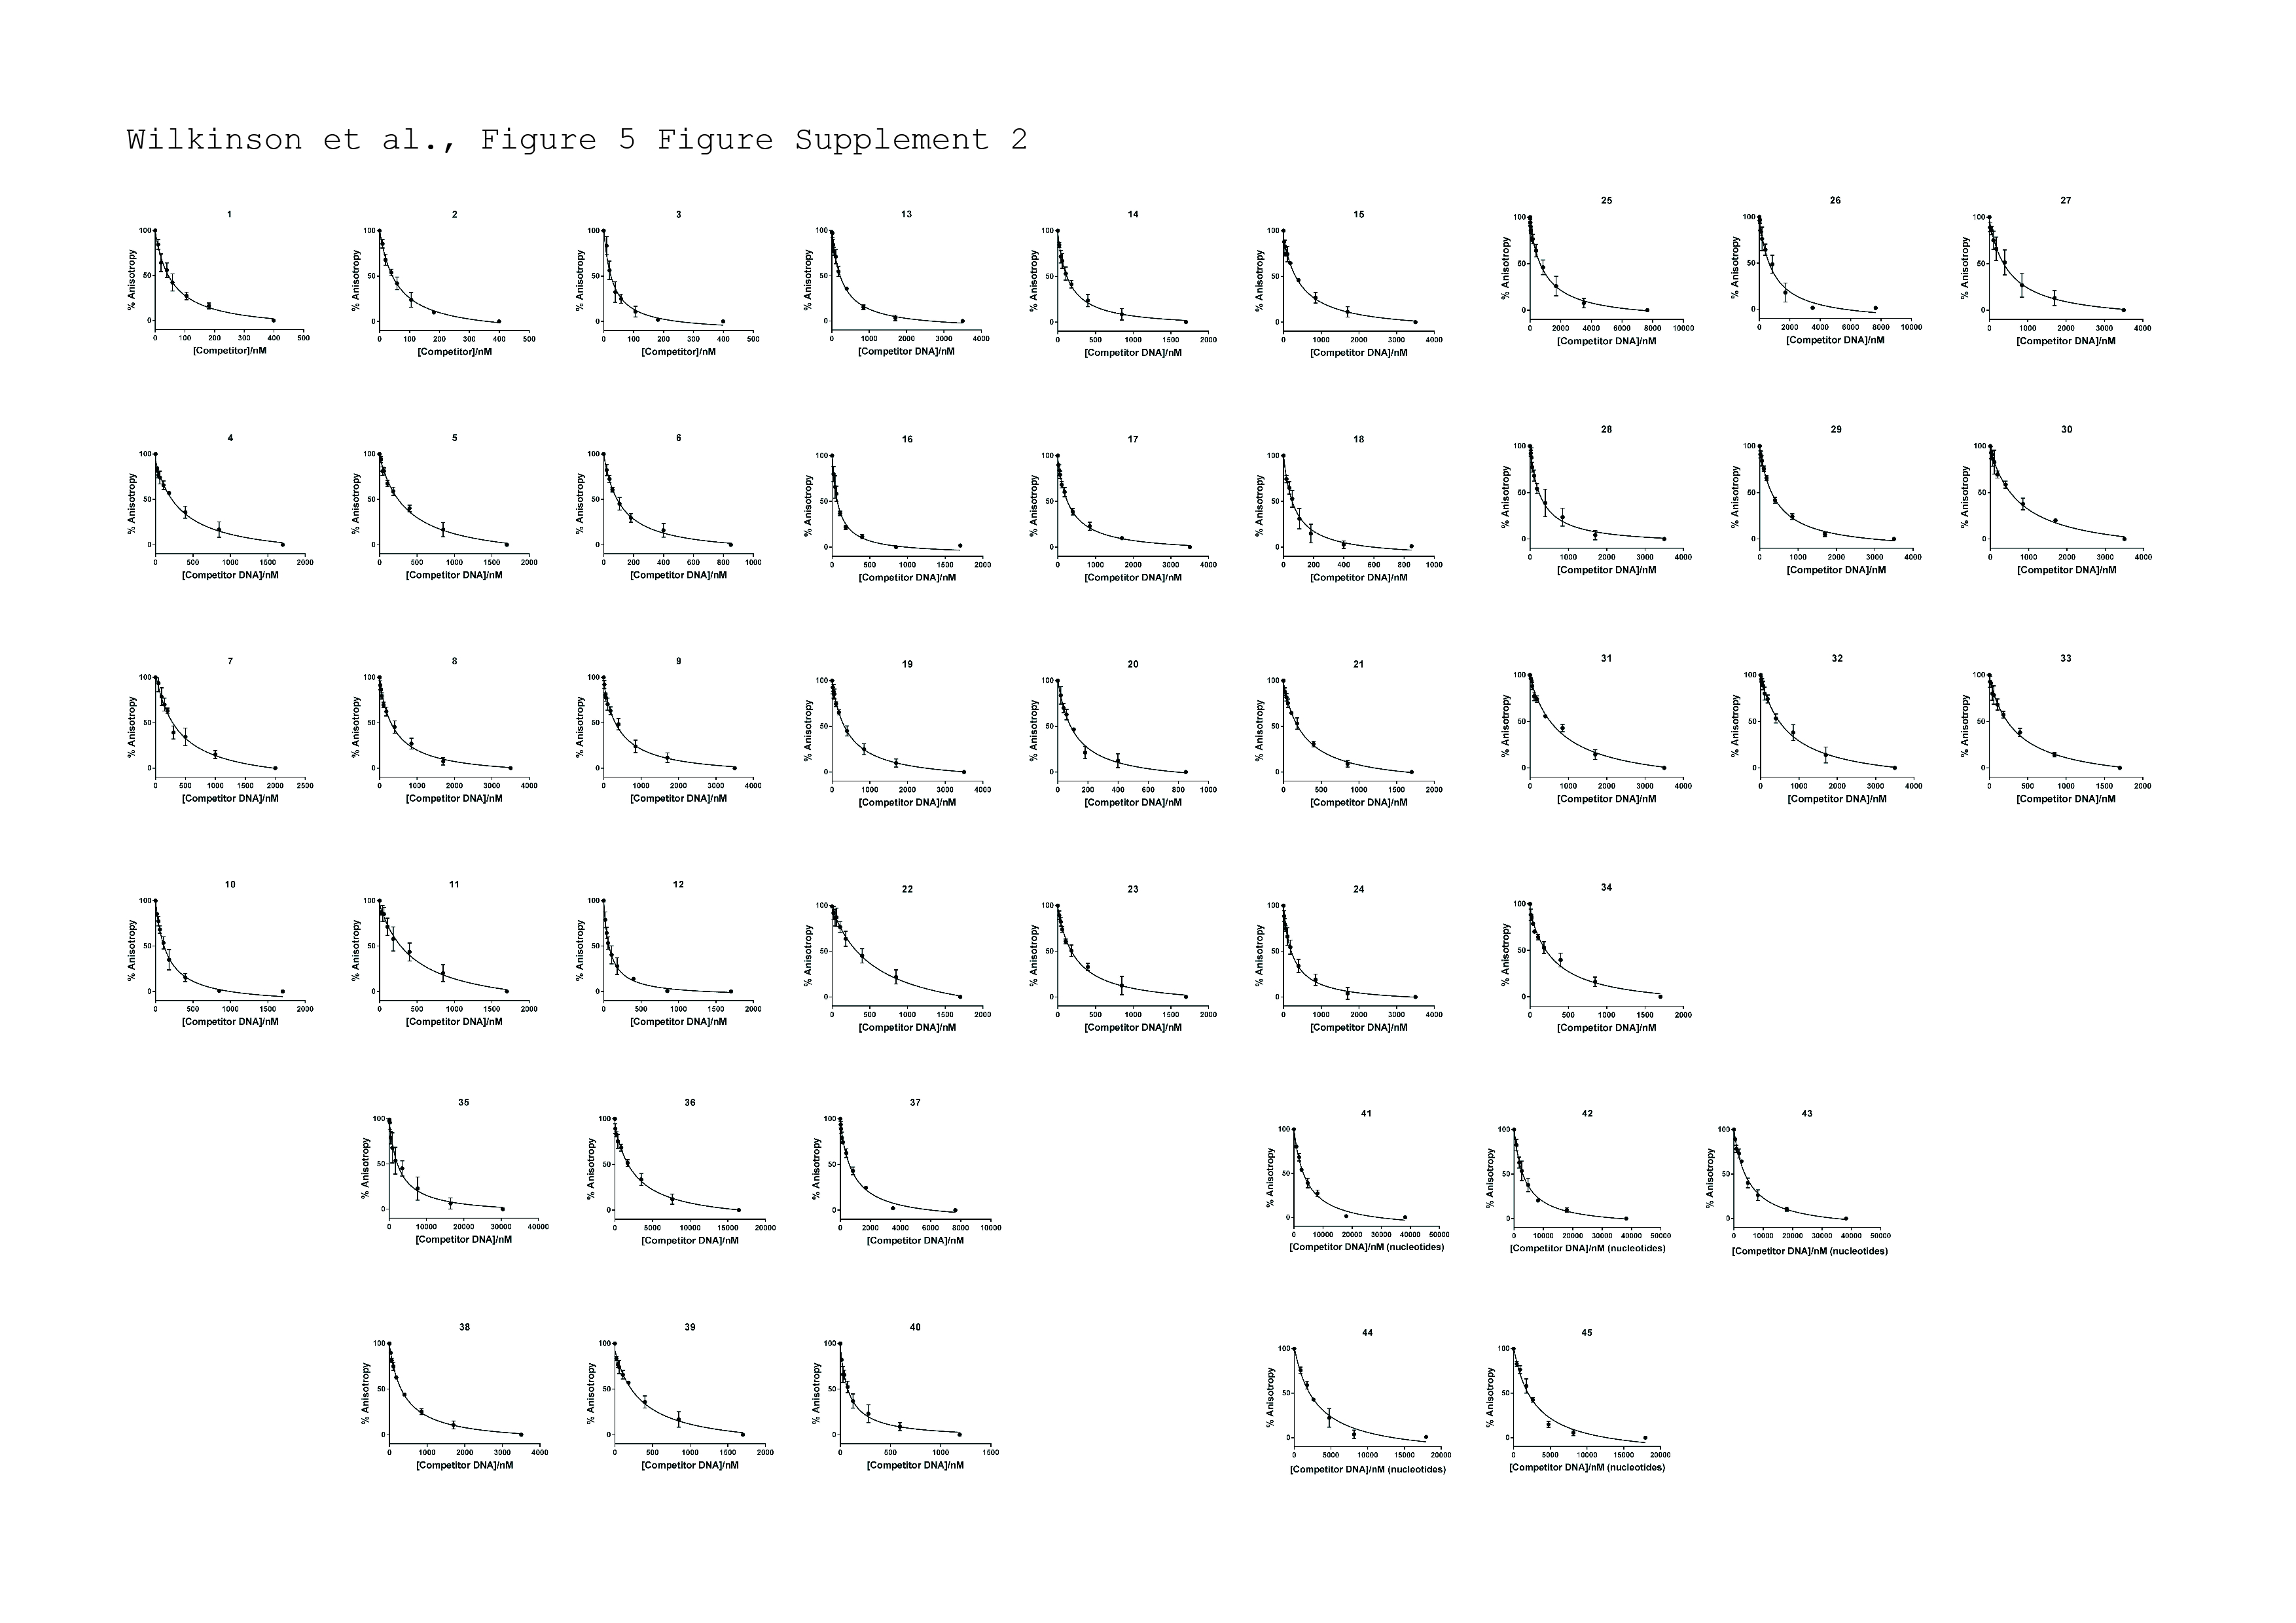

Supplement: supp [file elife-42129-supp-v1.zip › elife_poa_e42129_Figure_5_figure_supplement_2.jpg]

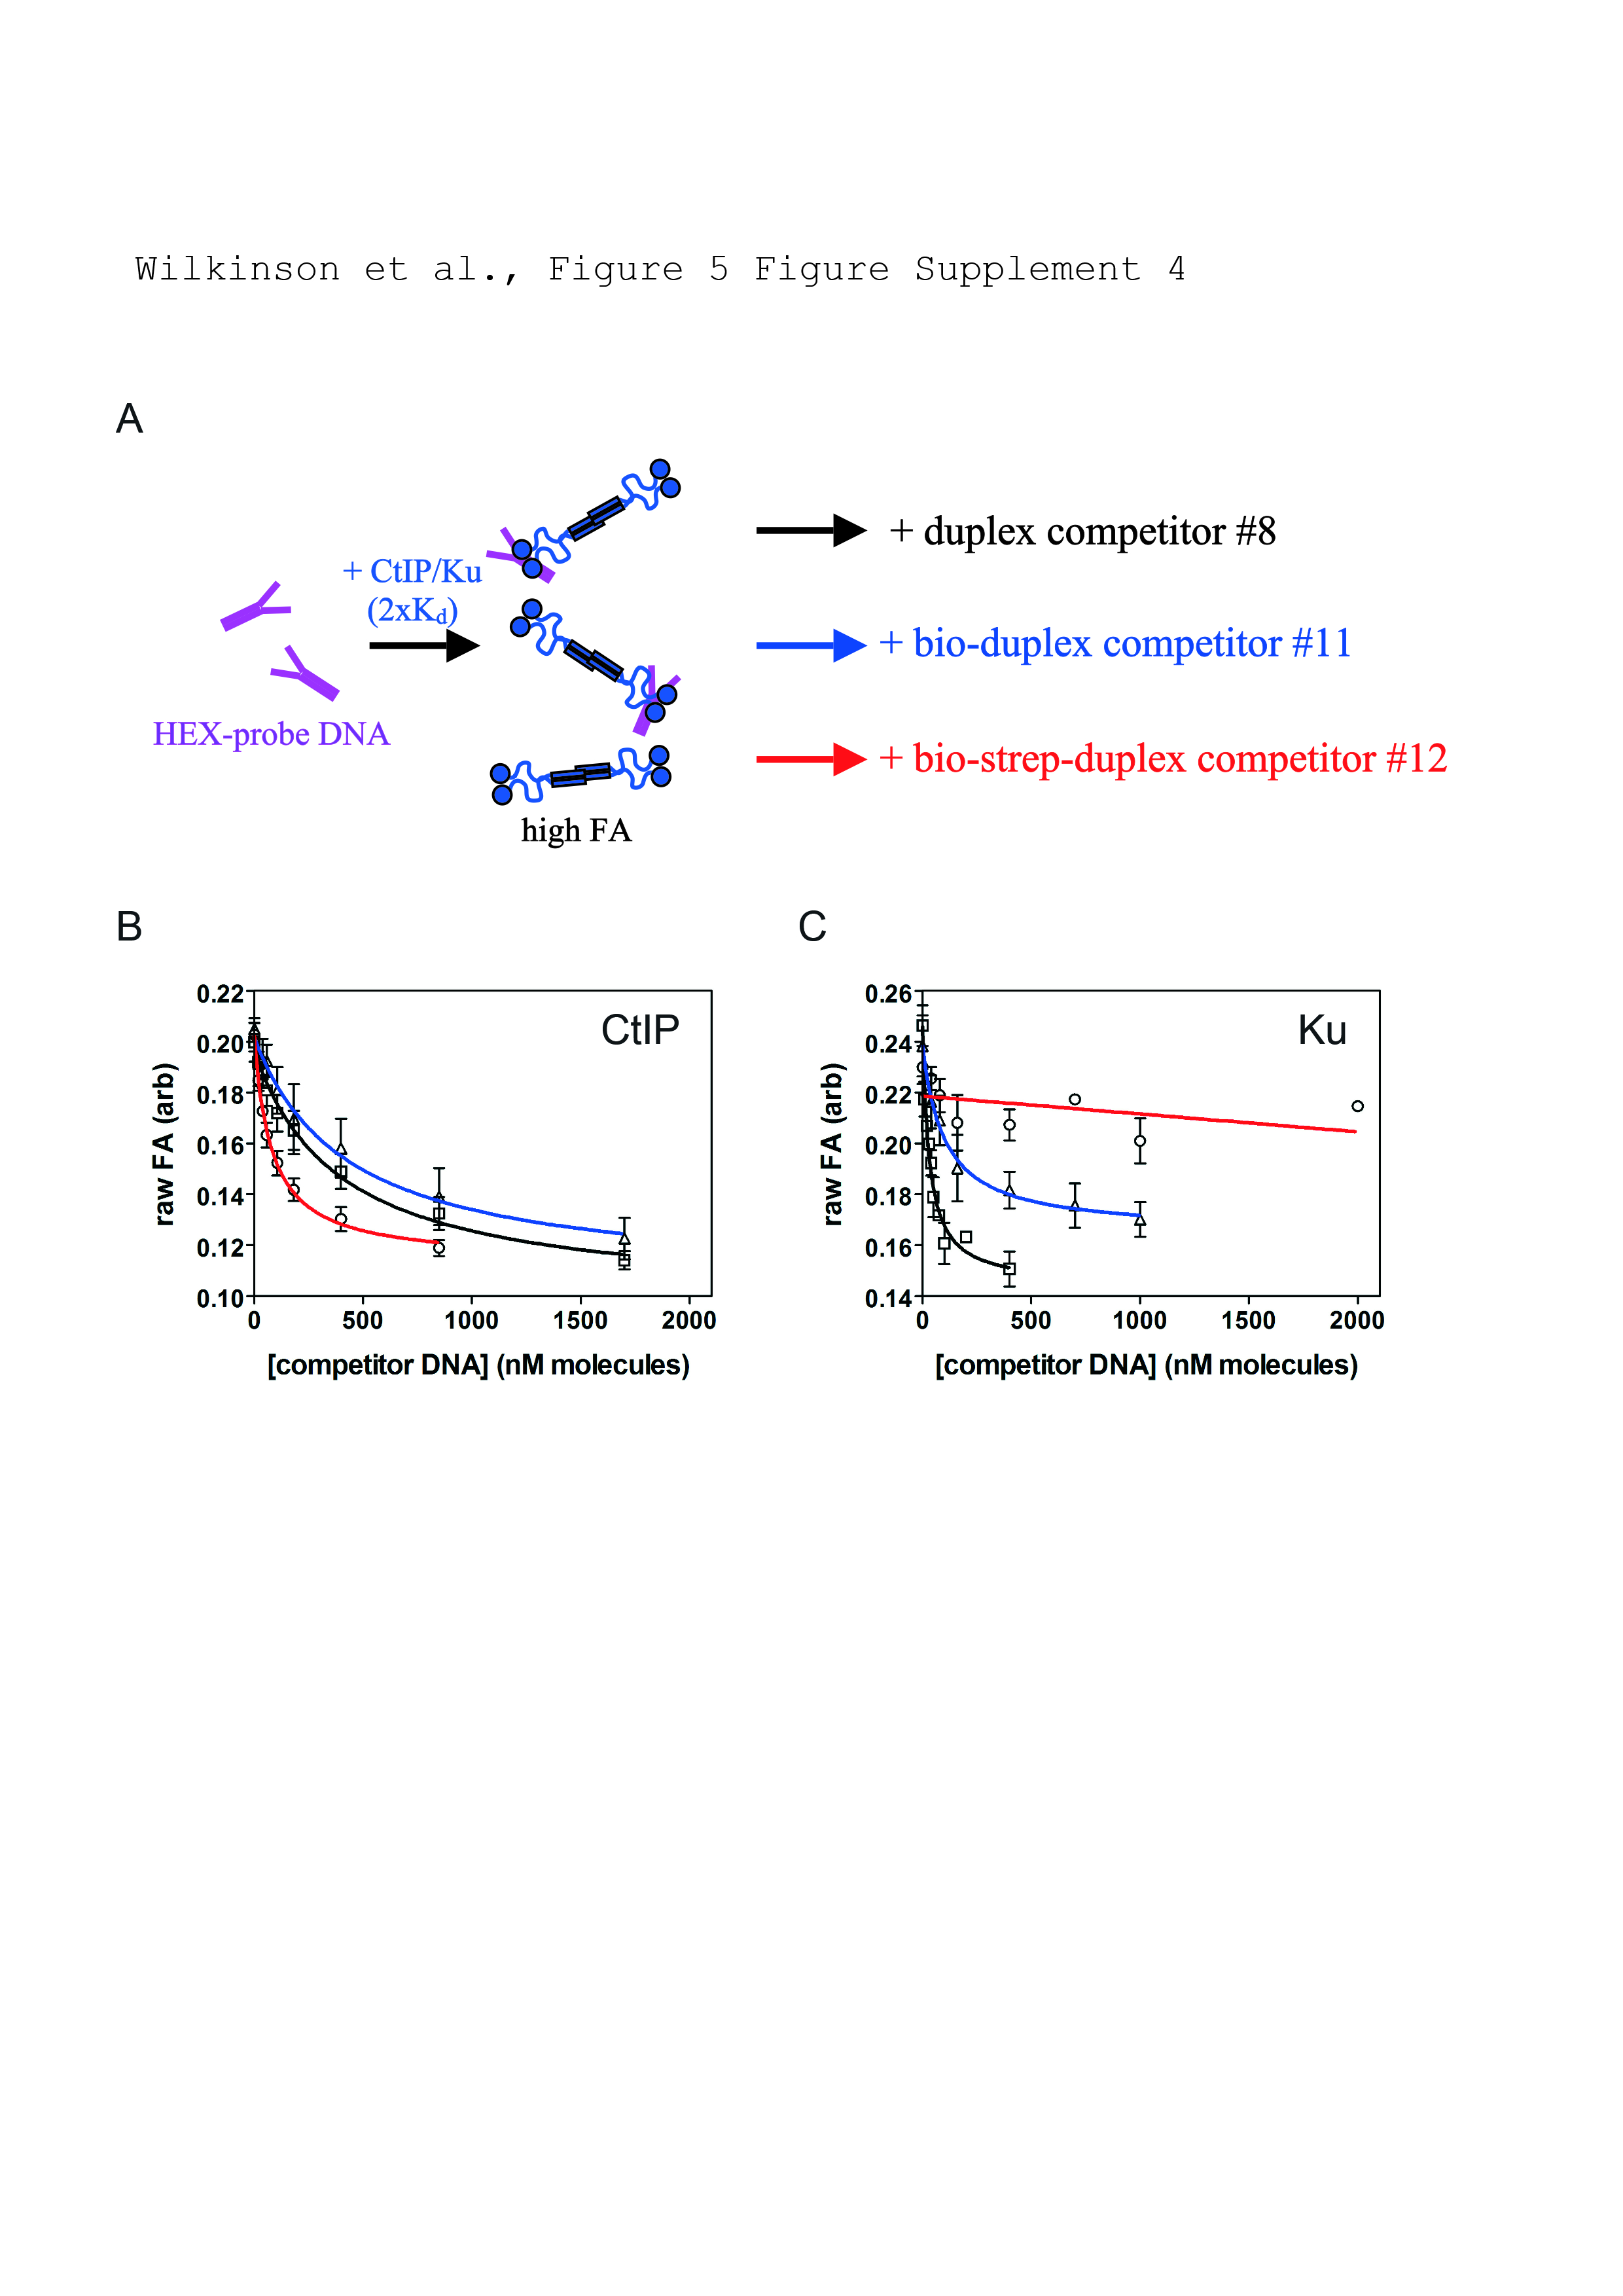

Supplement: supp [file elife-42129-supp-v1.zip › elife_poa_e42129_Figure_5_figure_supplement_4.jpg]

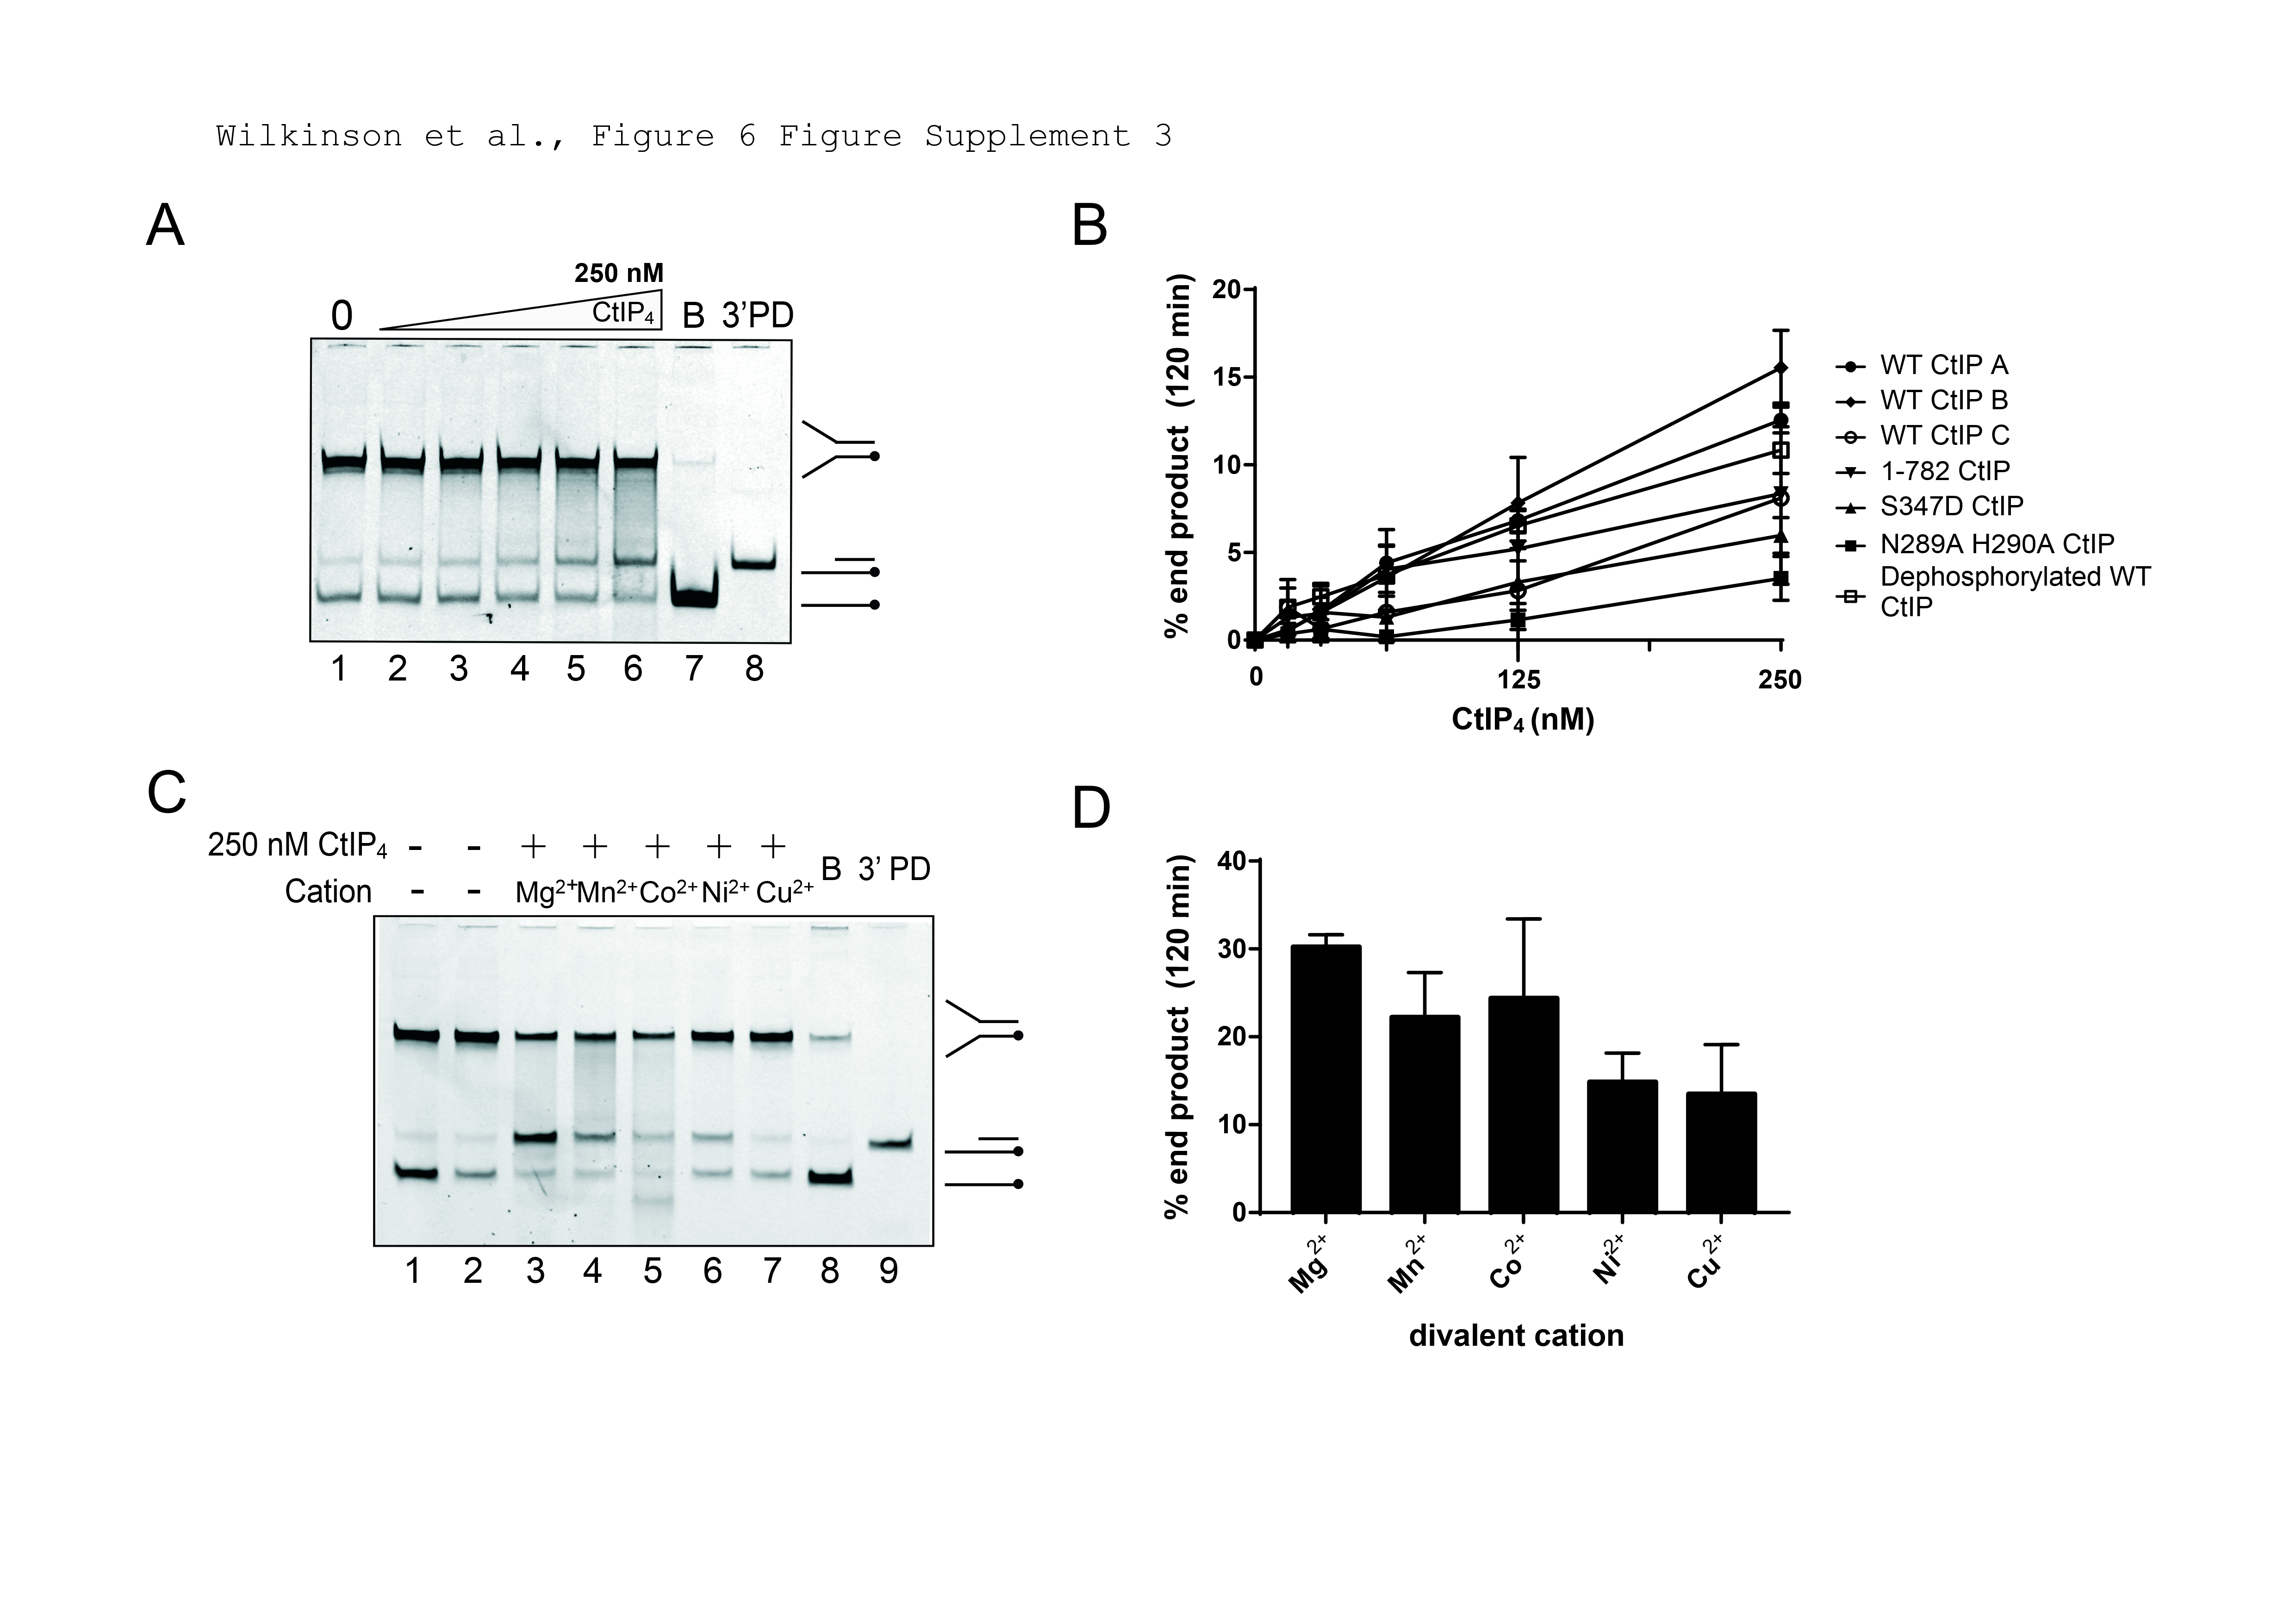

Supplement: supp [file elife-42129-supp-v1.zip › elife_poa_e42129_Figure_6_figure_supplement_3.jpg]

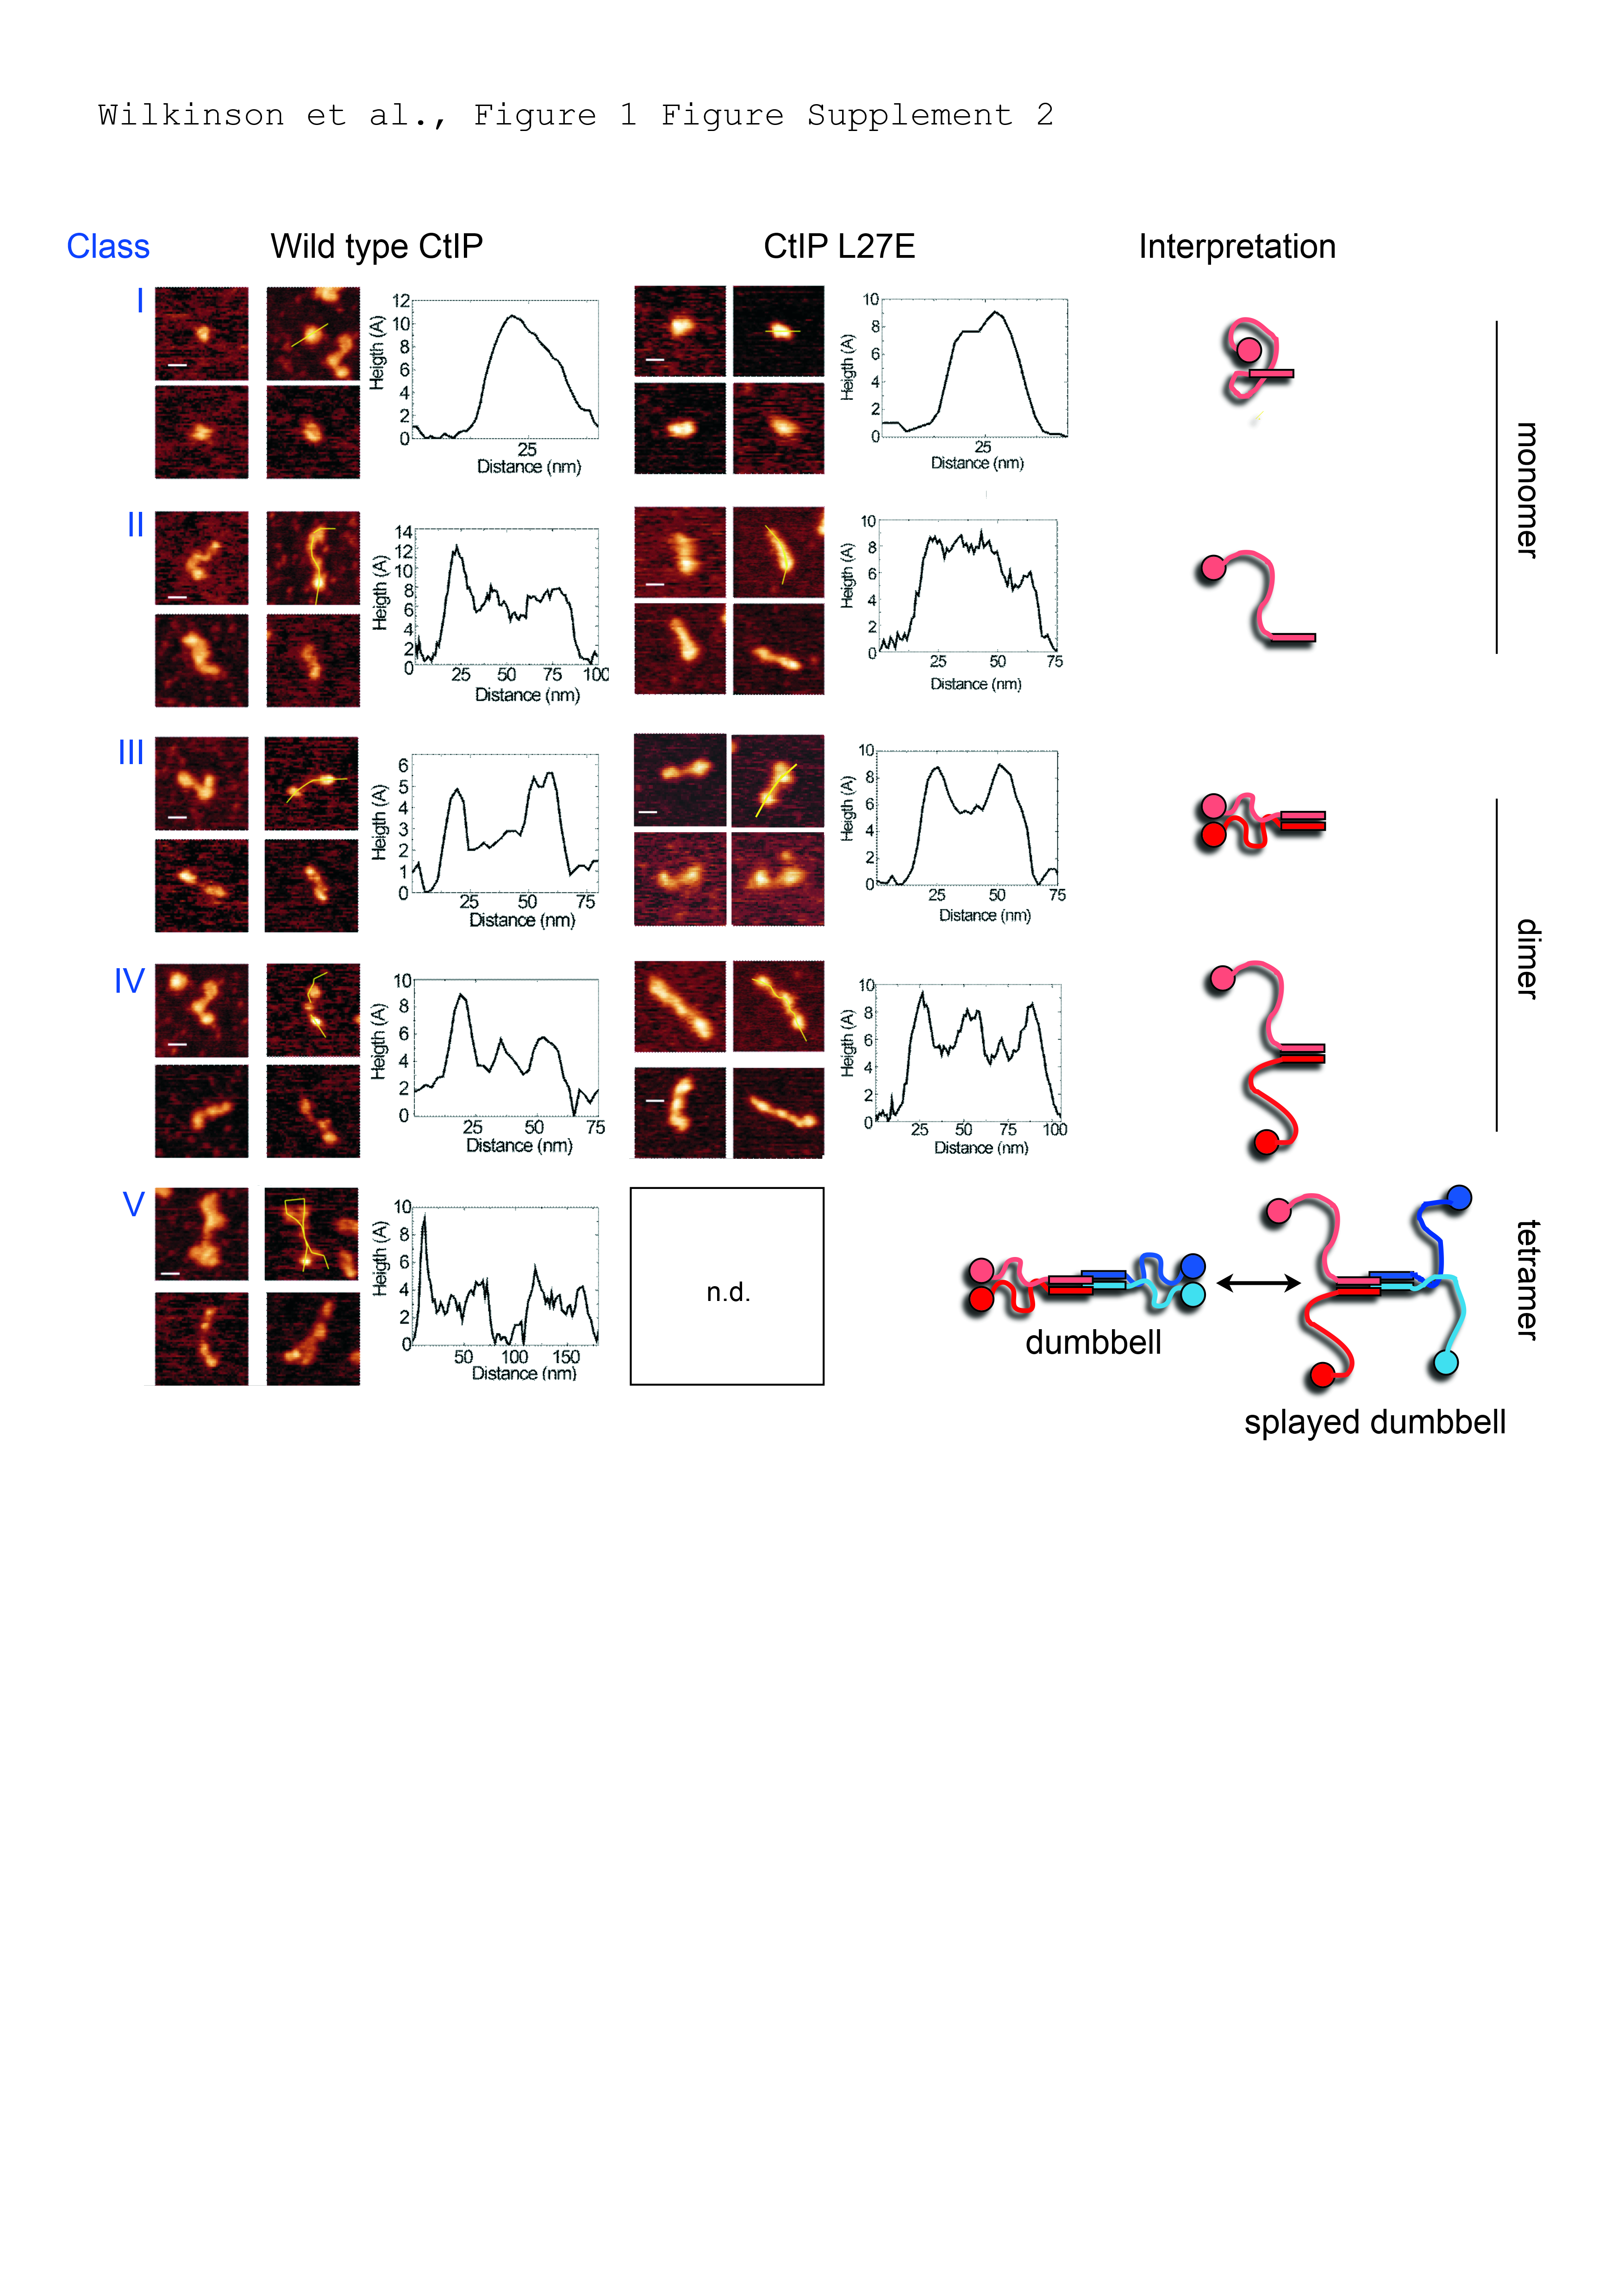

Supplement: supp [file elife-42129-supp-v1.zip › elife_poa_e42129_Figure_1_figure_supplement_2.jpg]

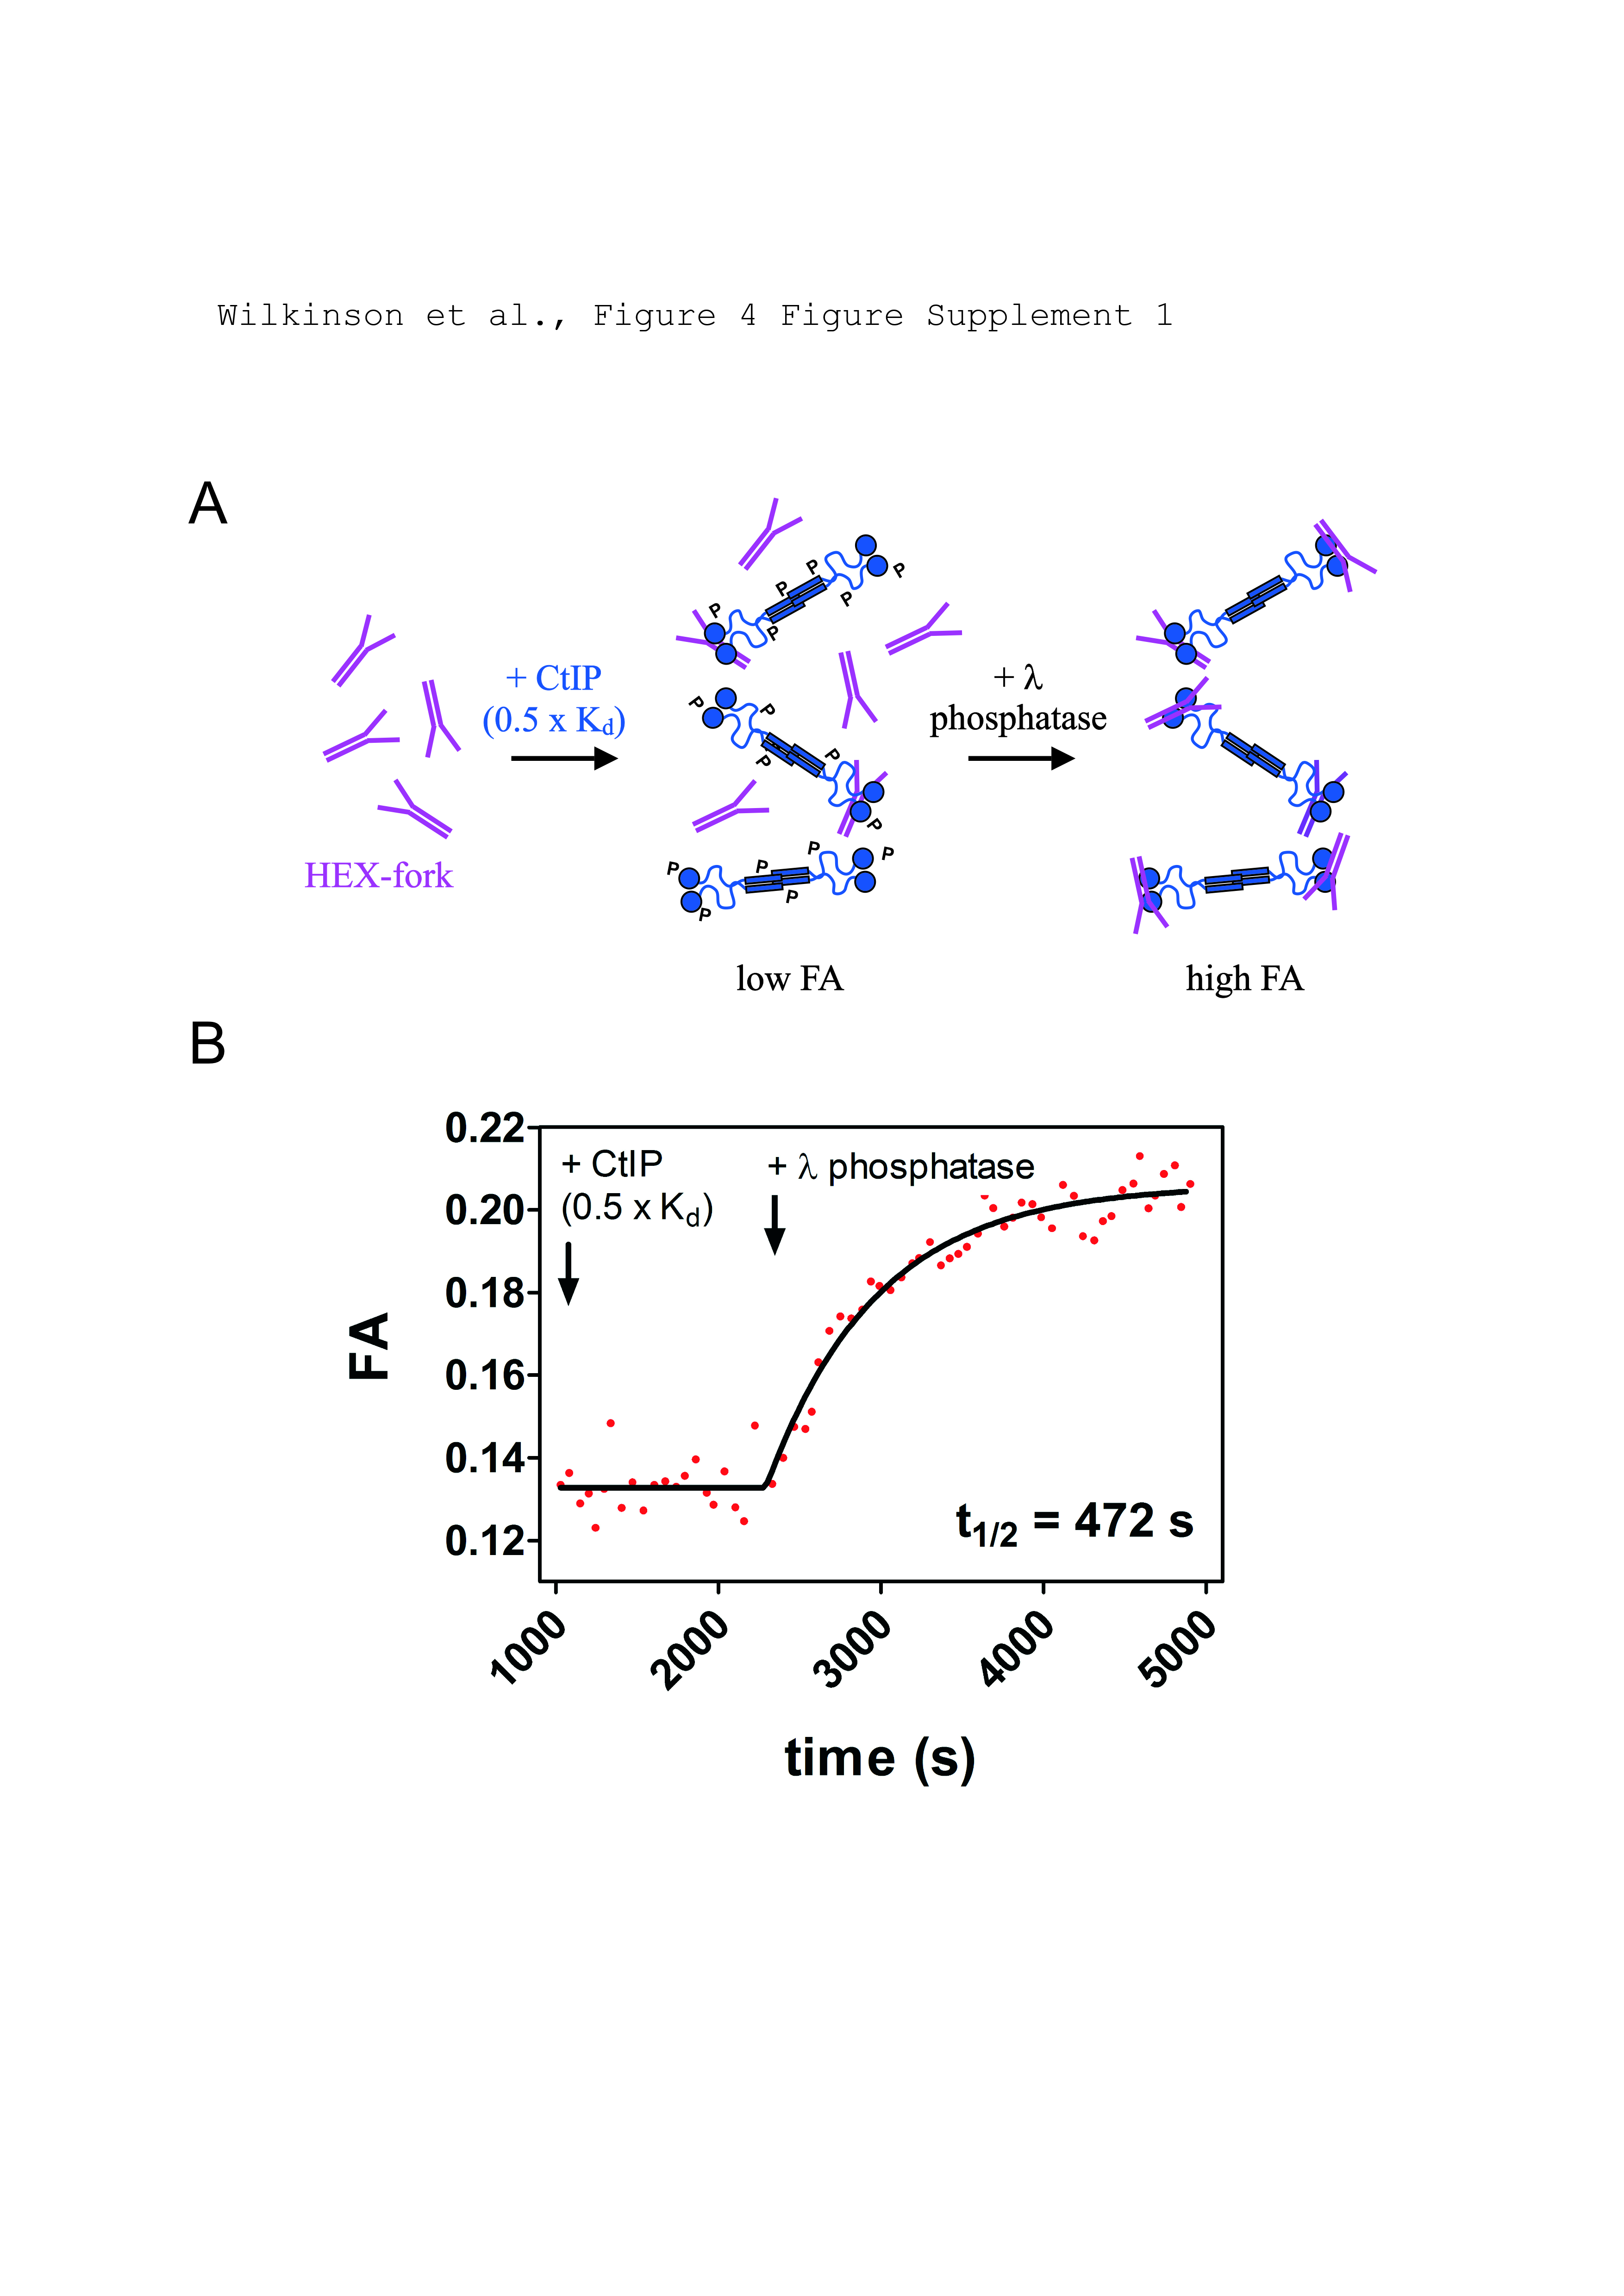

Supplement: supp [file elife-42129-supp-v1.zip › elife_poa_e42129_Figure_4_figure_supplement_1.jpg]

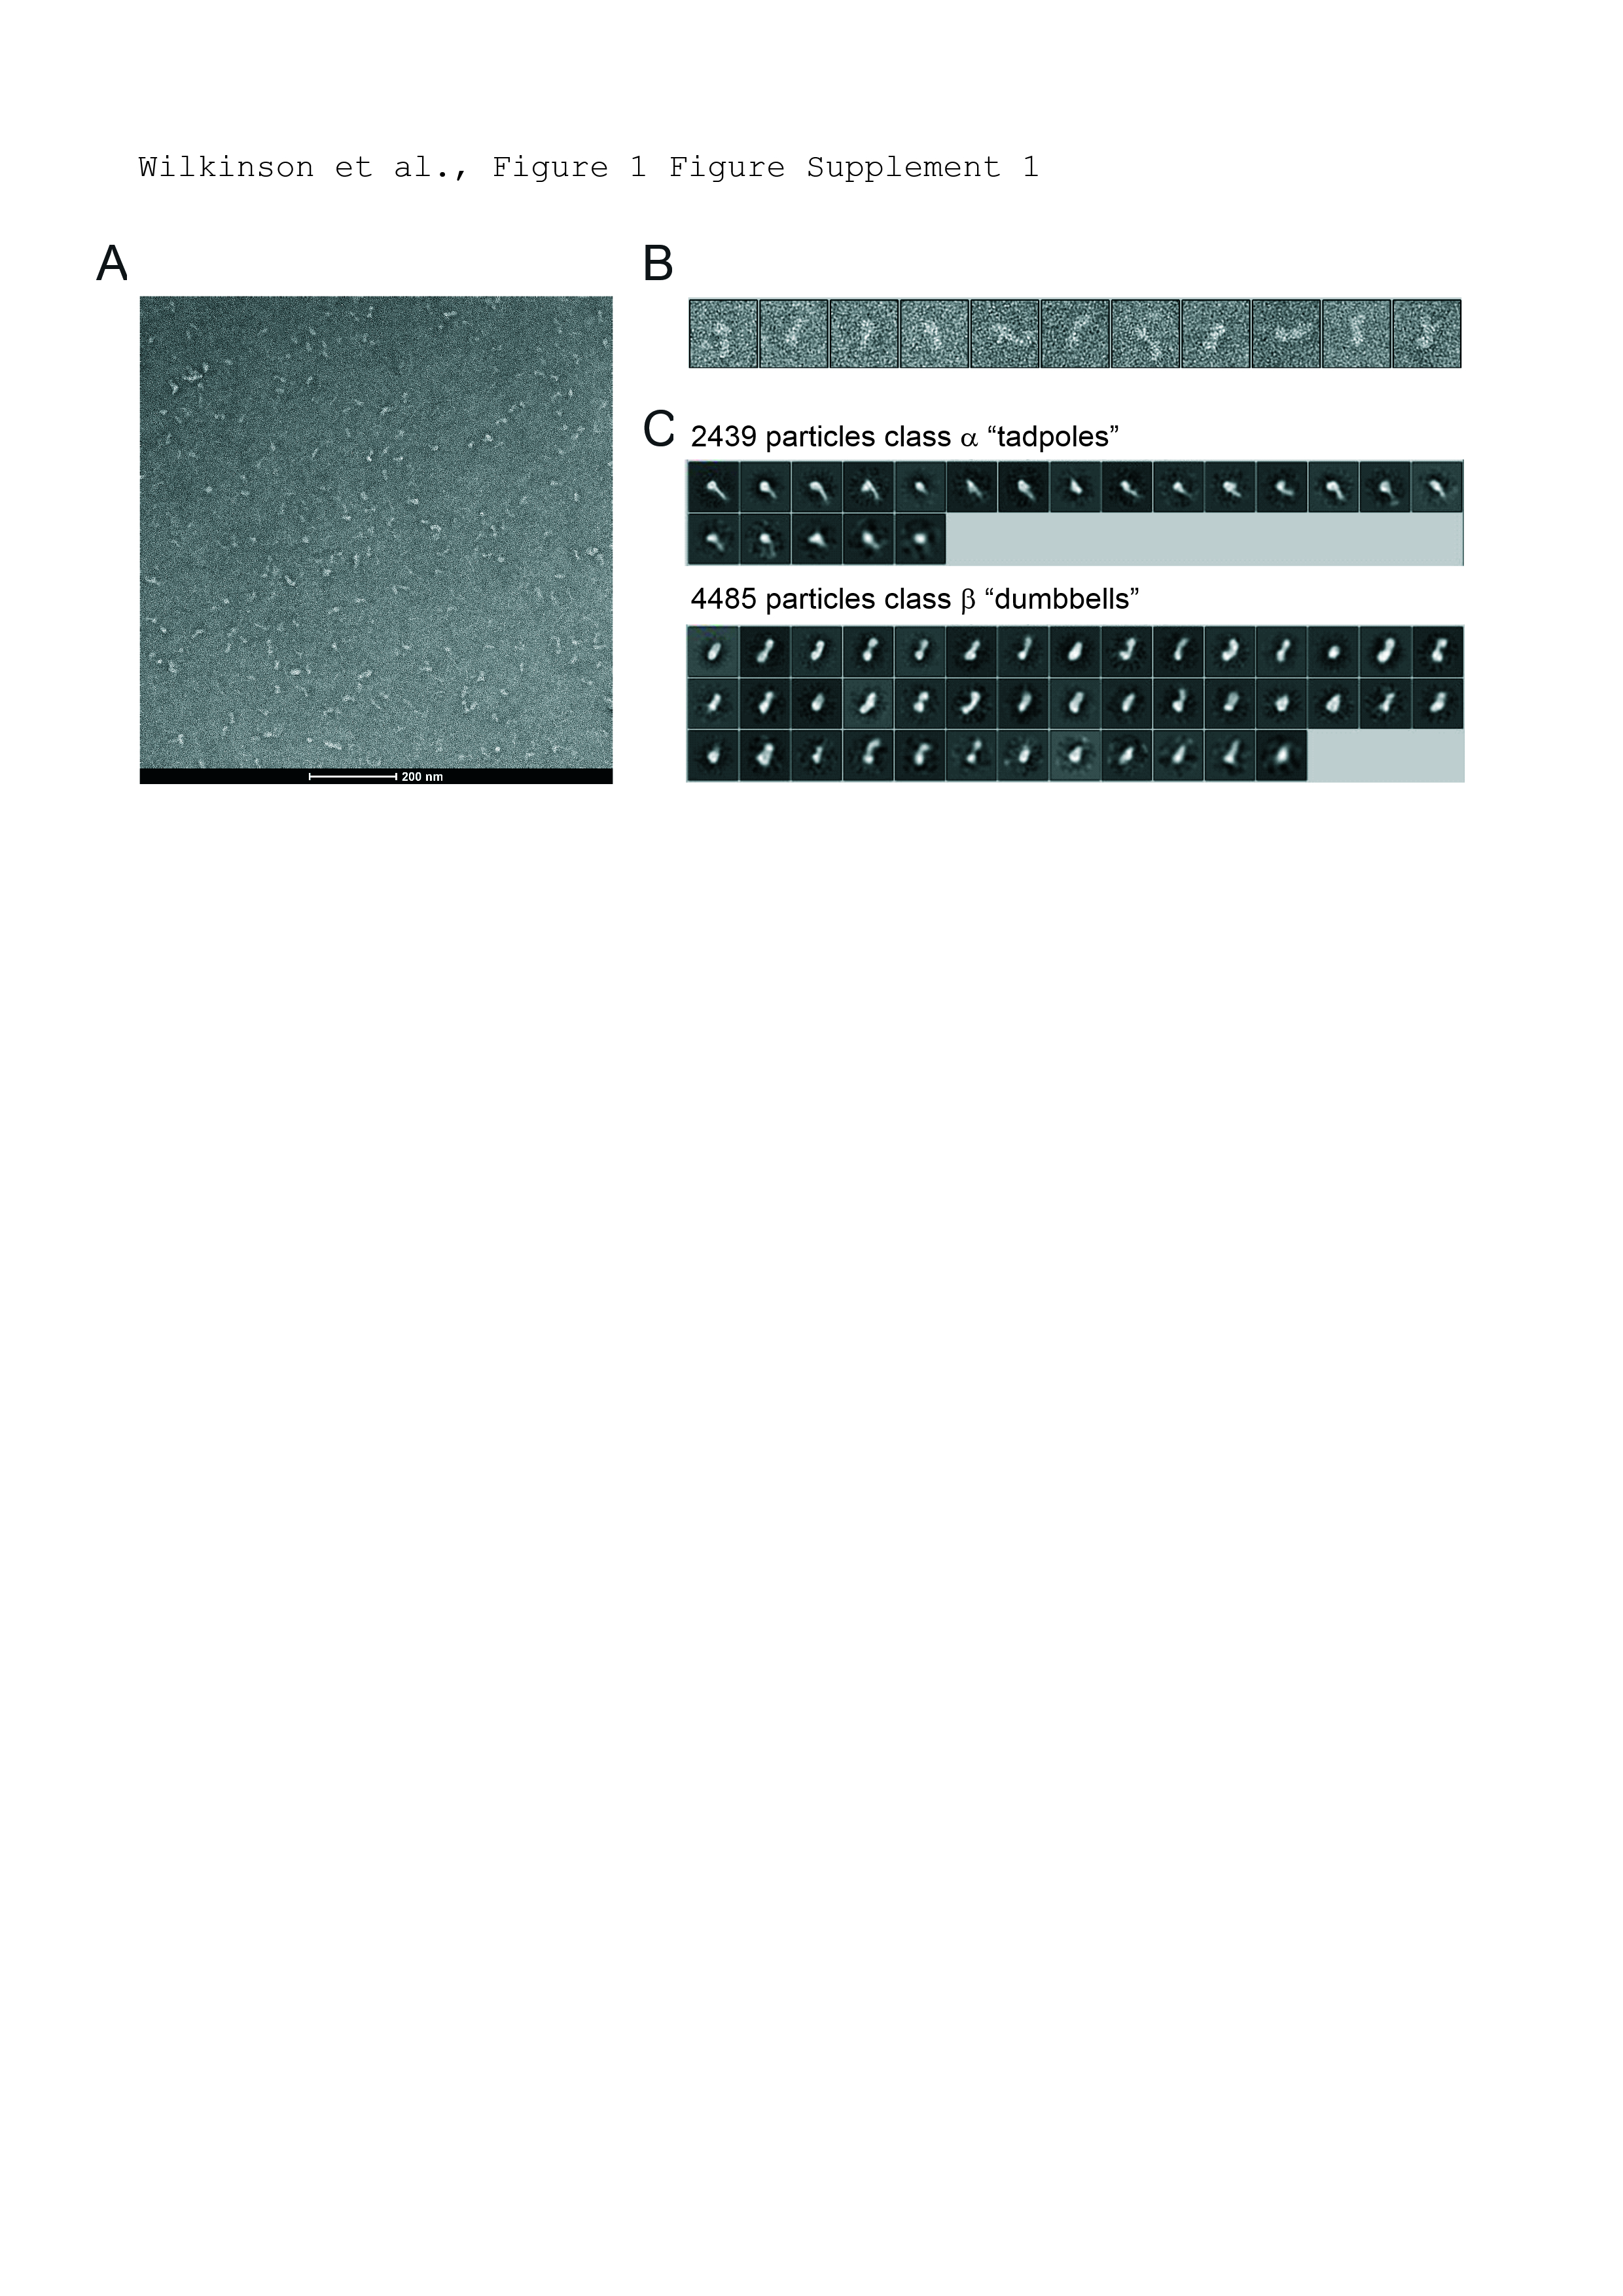

Supplement: supp [file elife-42129-supp-v1.zip › elife_poa_e42129_Figure_1_figure_supplement_1.jpg]

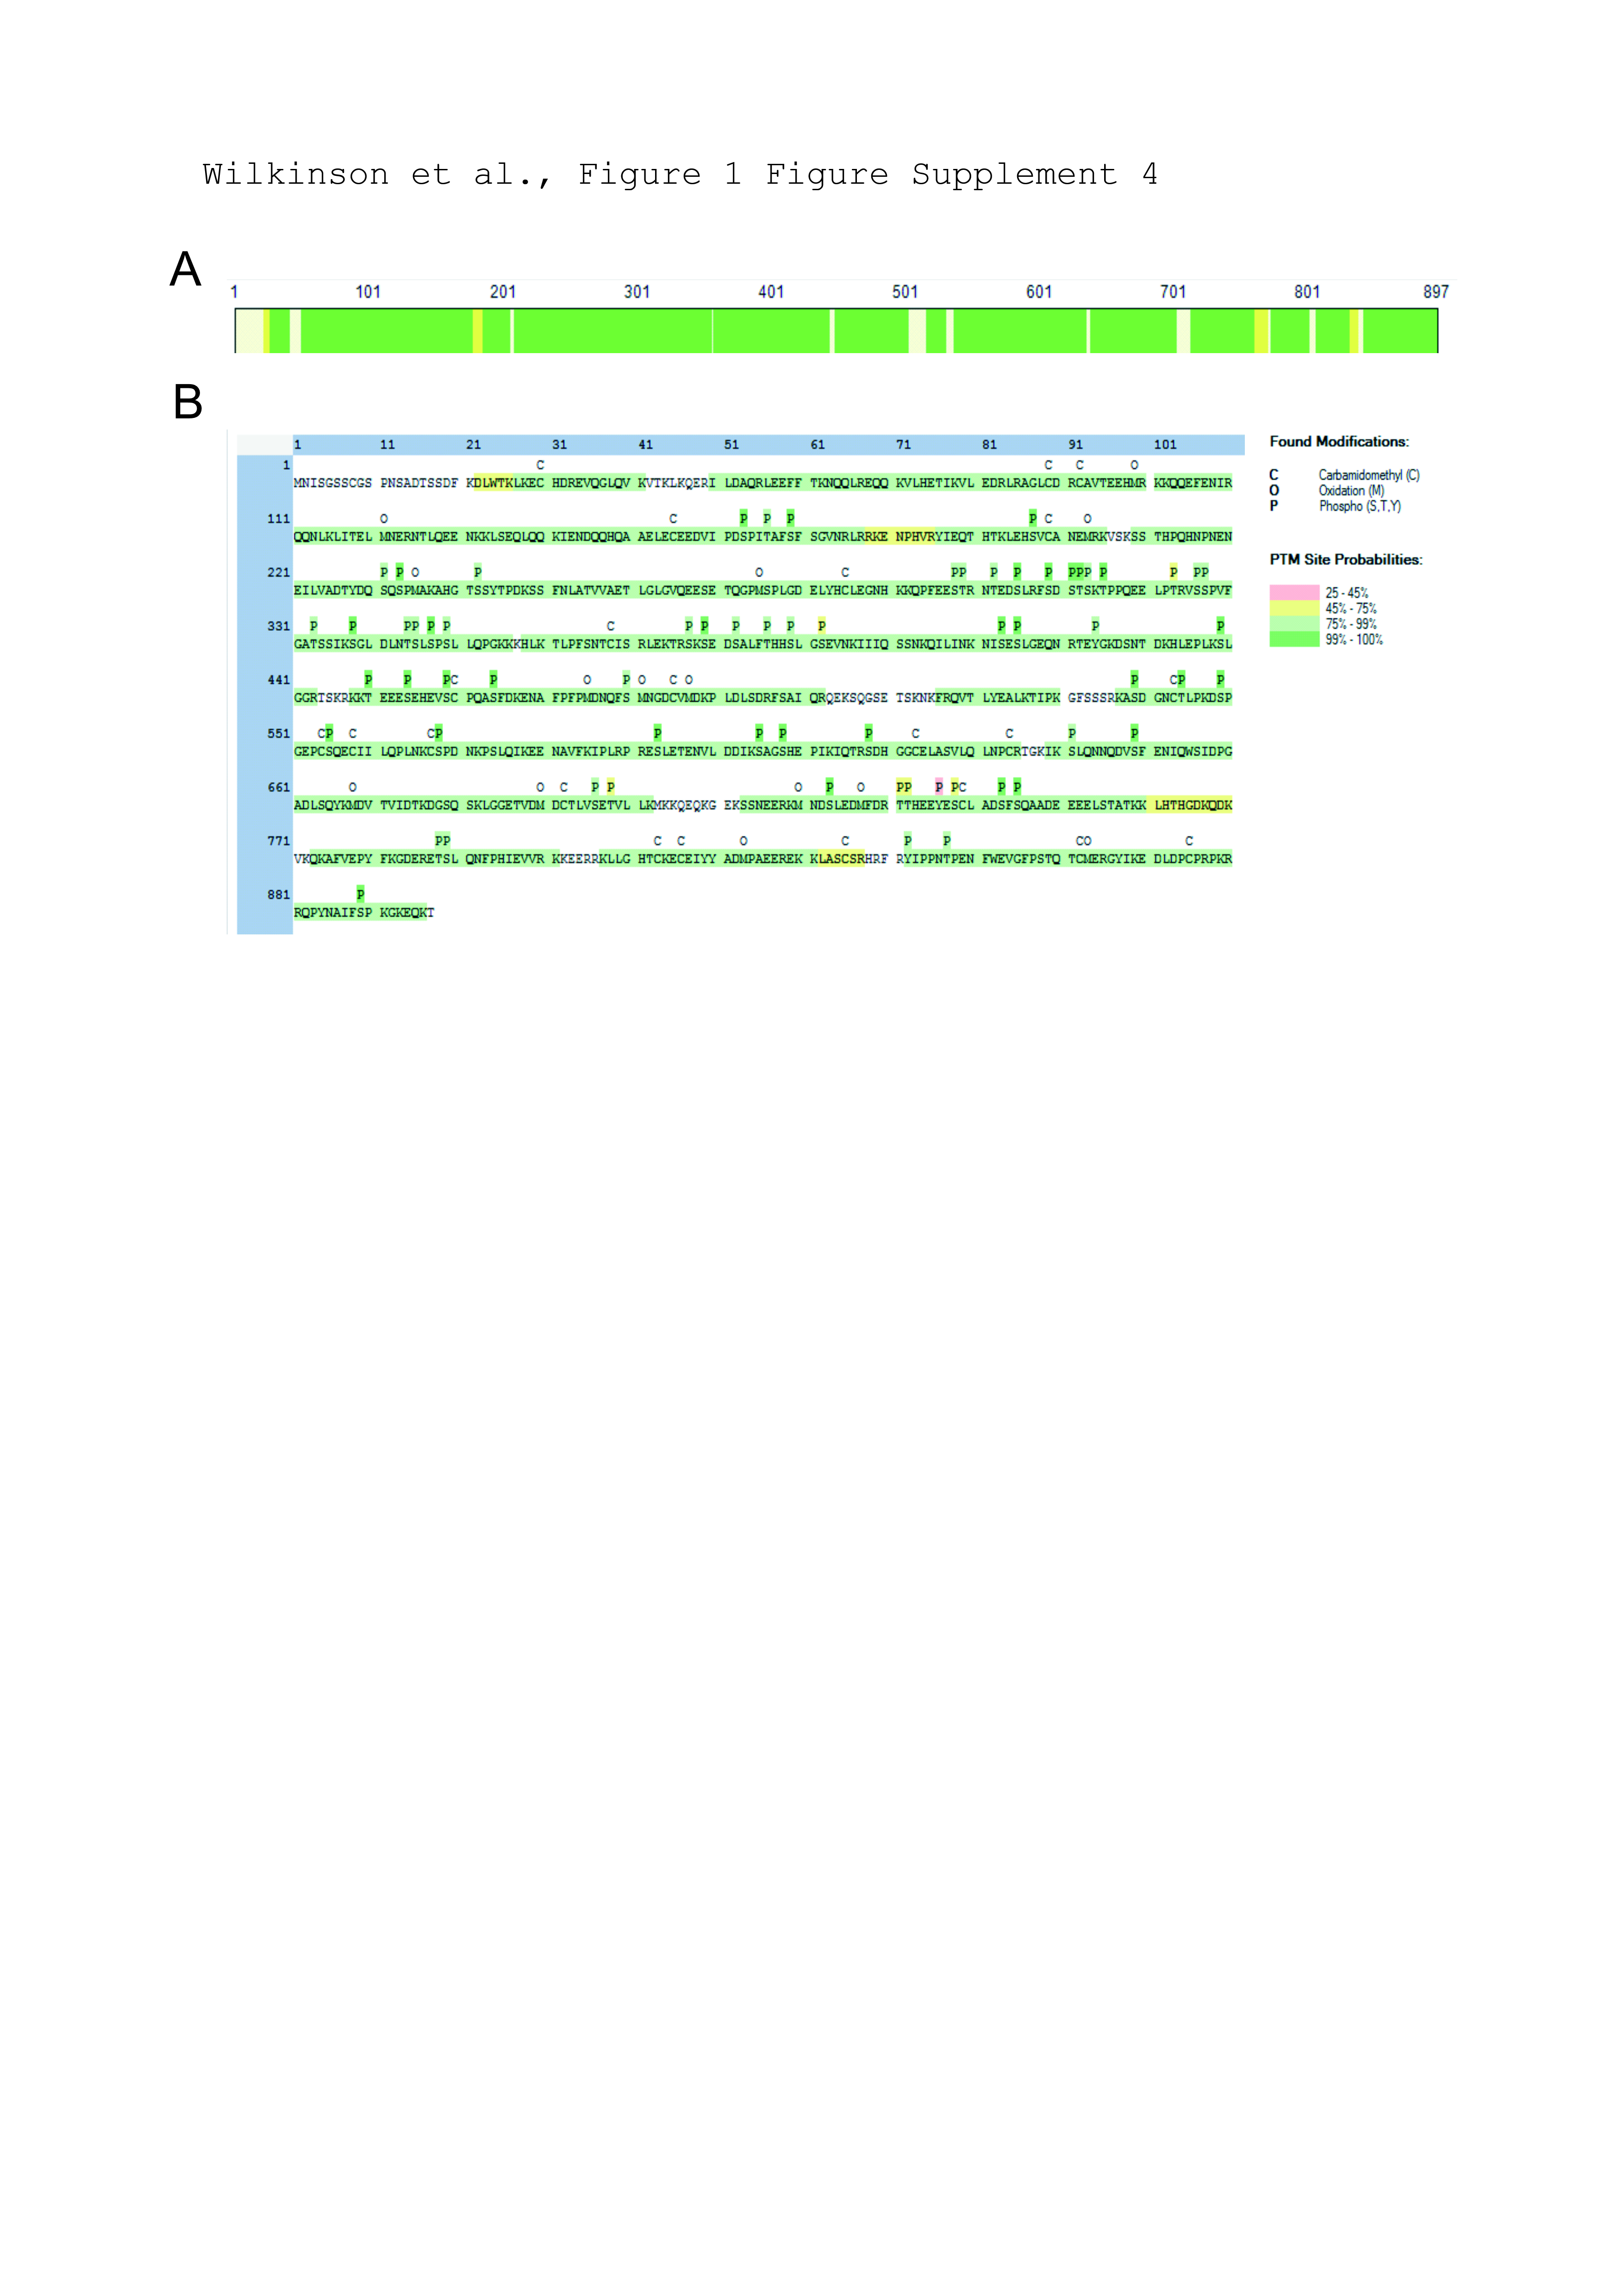

Supplement: supp [file elife-42129-supp-v1.zip › elife_poa_e42129_Figure_1_figure_supplement_4.jpg]

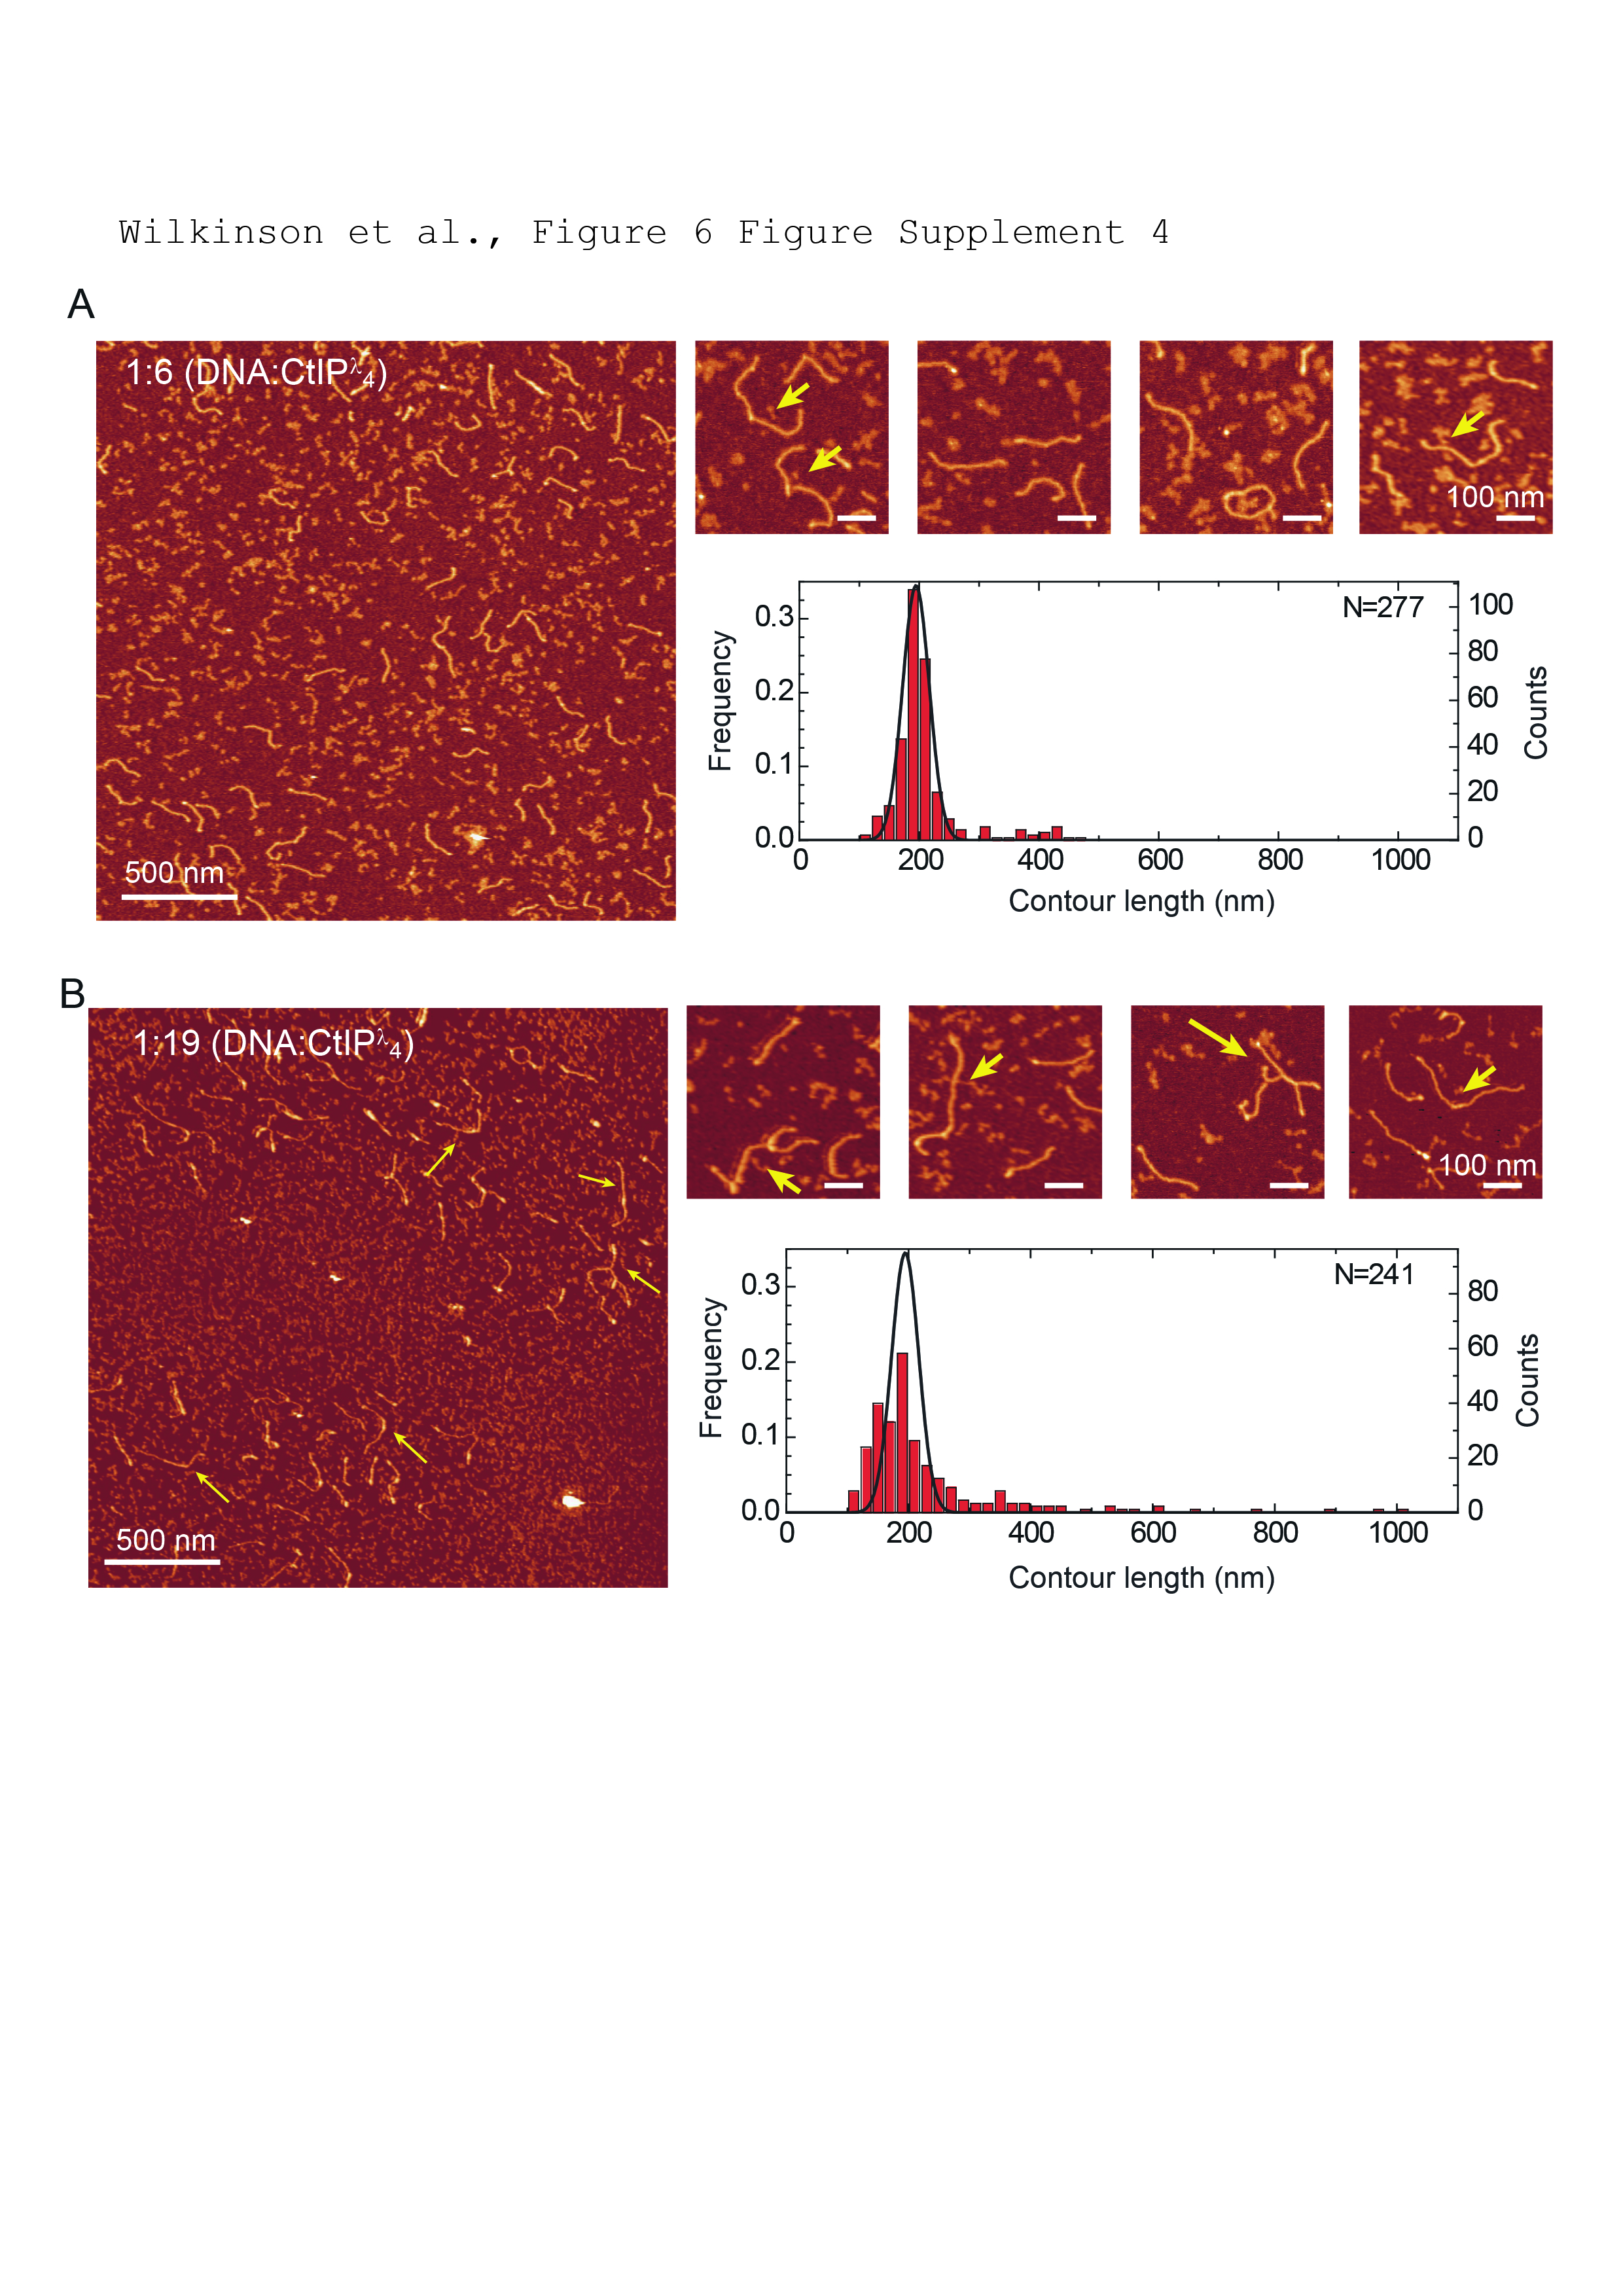

Supplement: supp [file elife-42129-supp-v1.zip › elife_poa_e42129_Figure_6_figure_supplement_4.jpg]

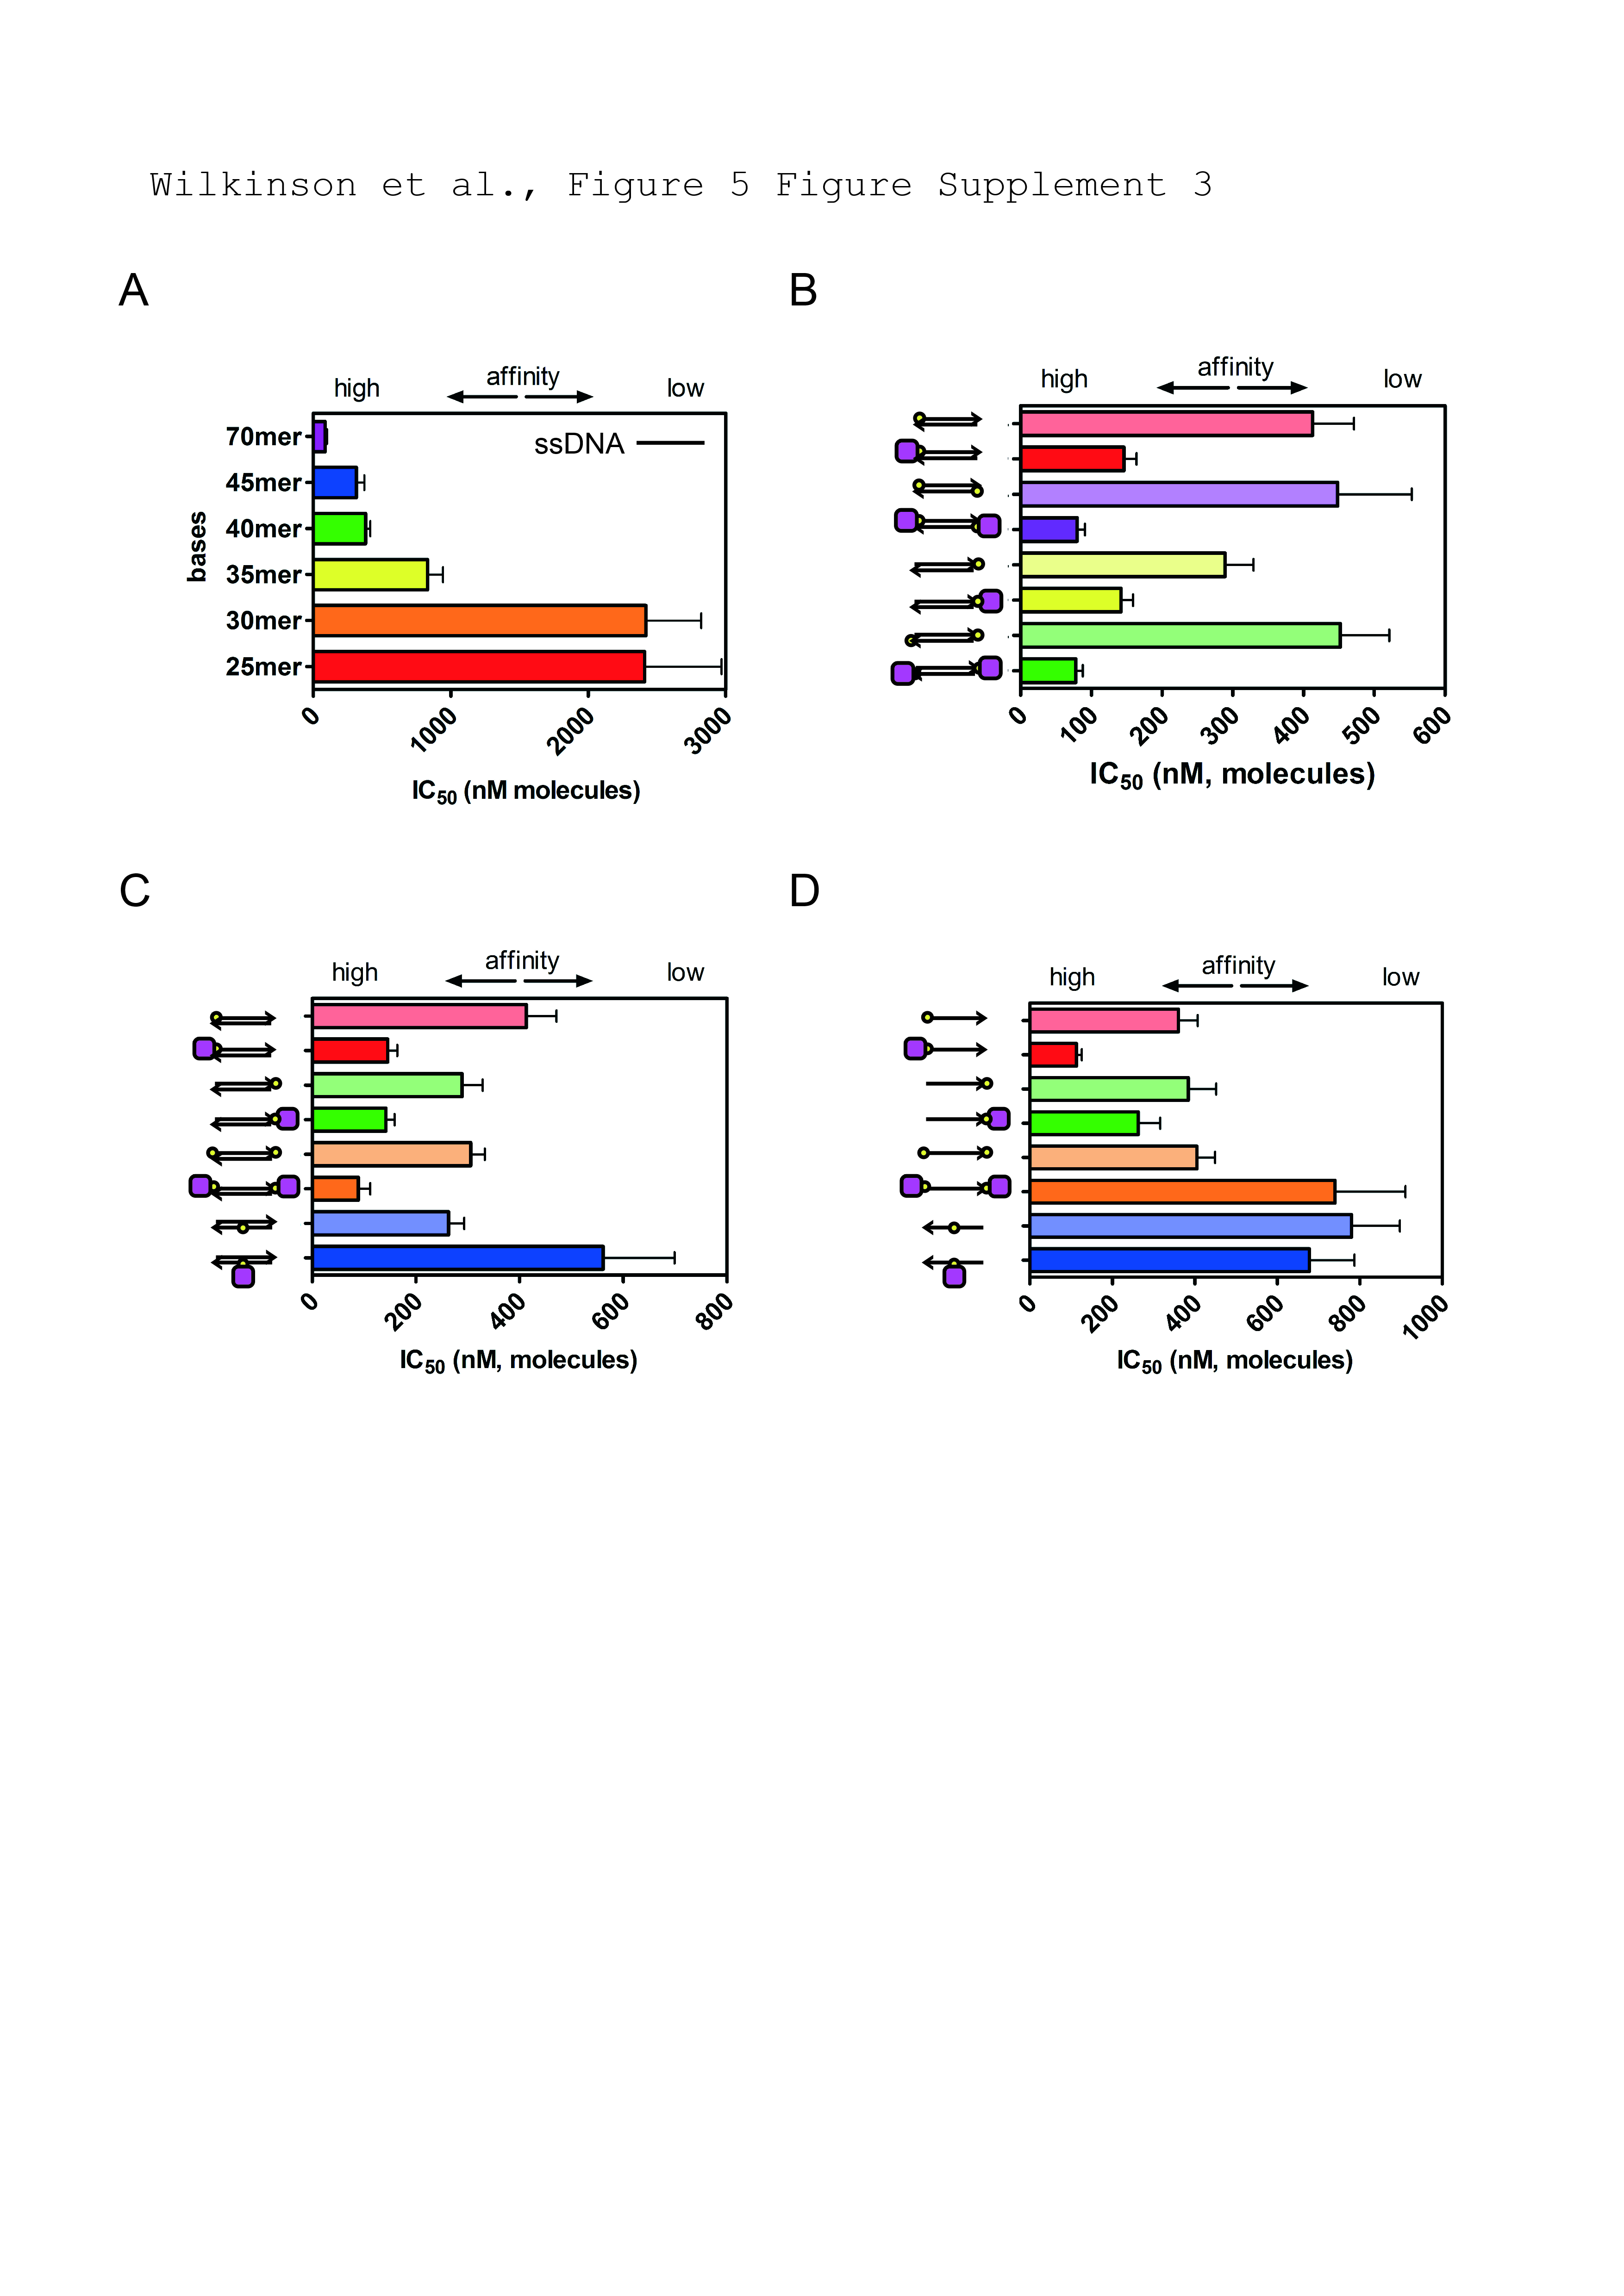

Supplement: supp [file elife-42129-supp-v1.zip › elife_poa_e42129_Figure_5_figure_supplement_3.jpg]

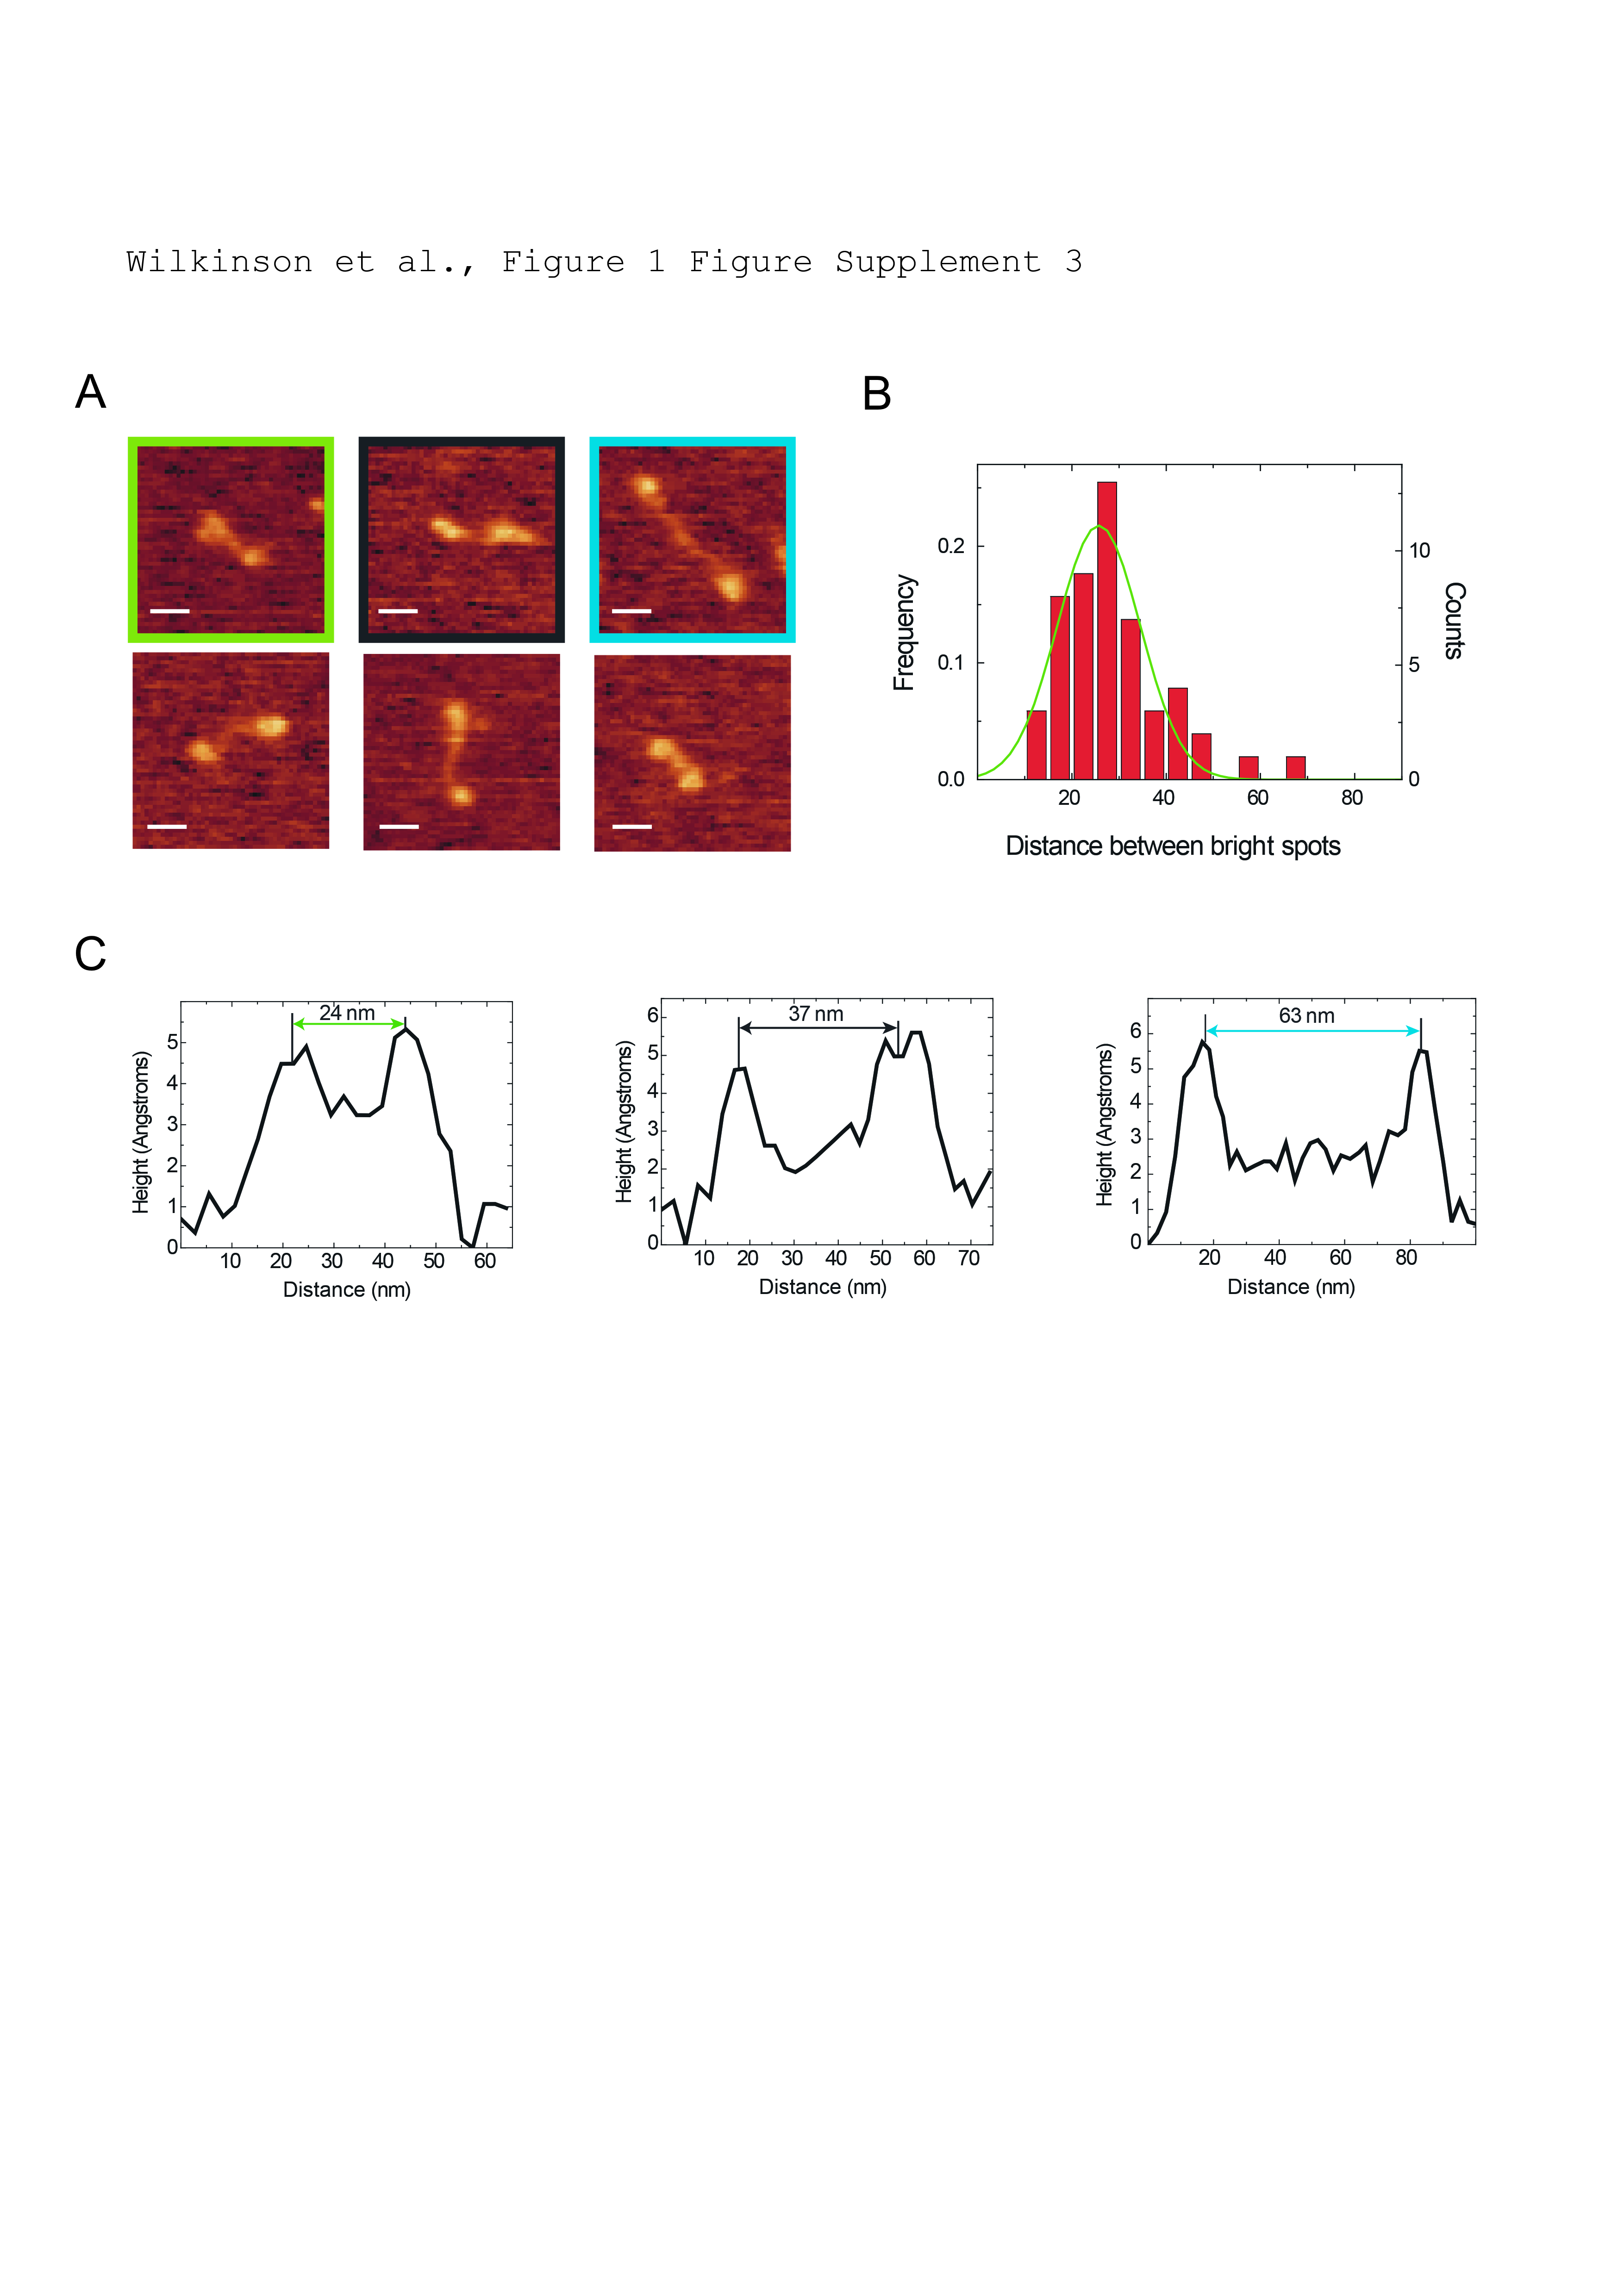

Supplement: supp [file elife-42129-supp-v1.zip › elife_poa_e42129_Figure_1_figure_supplement_3.jpg]

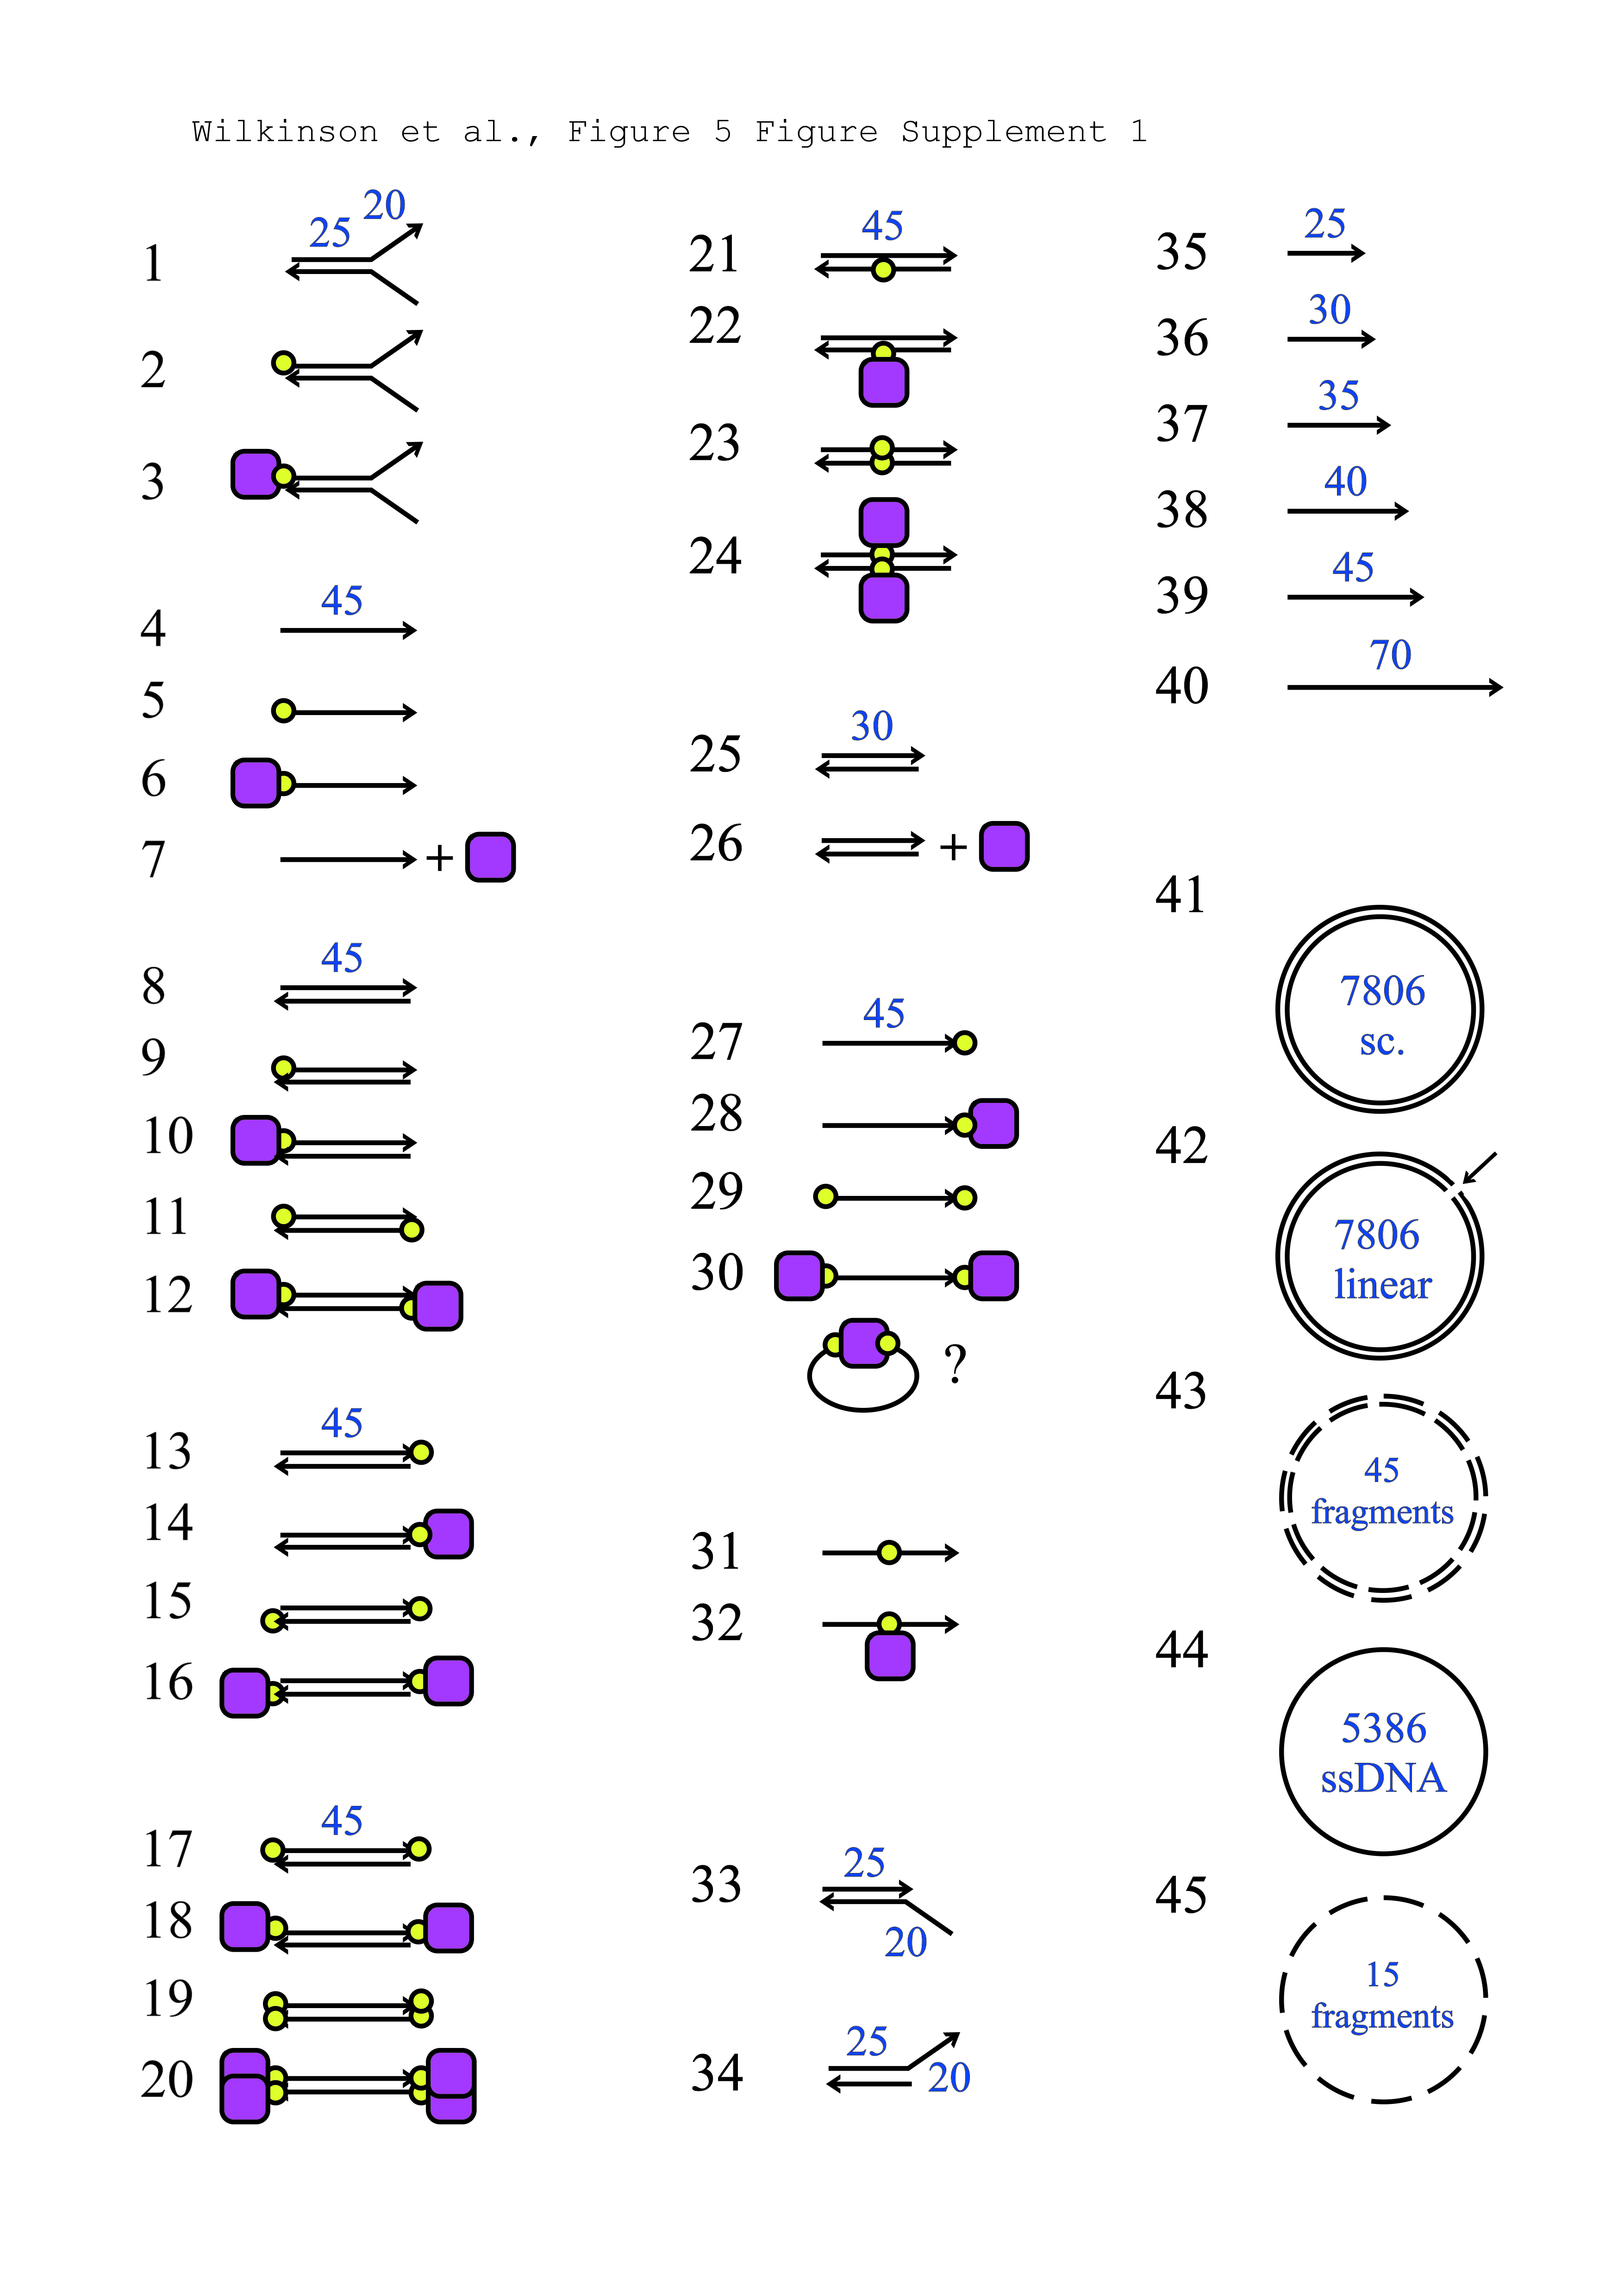

Supplement: supp [file elife-42129-supp-v1.zip › elife_poa_e42129_Figure_5_figure_supplement_1.jpg]

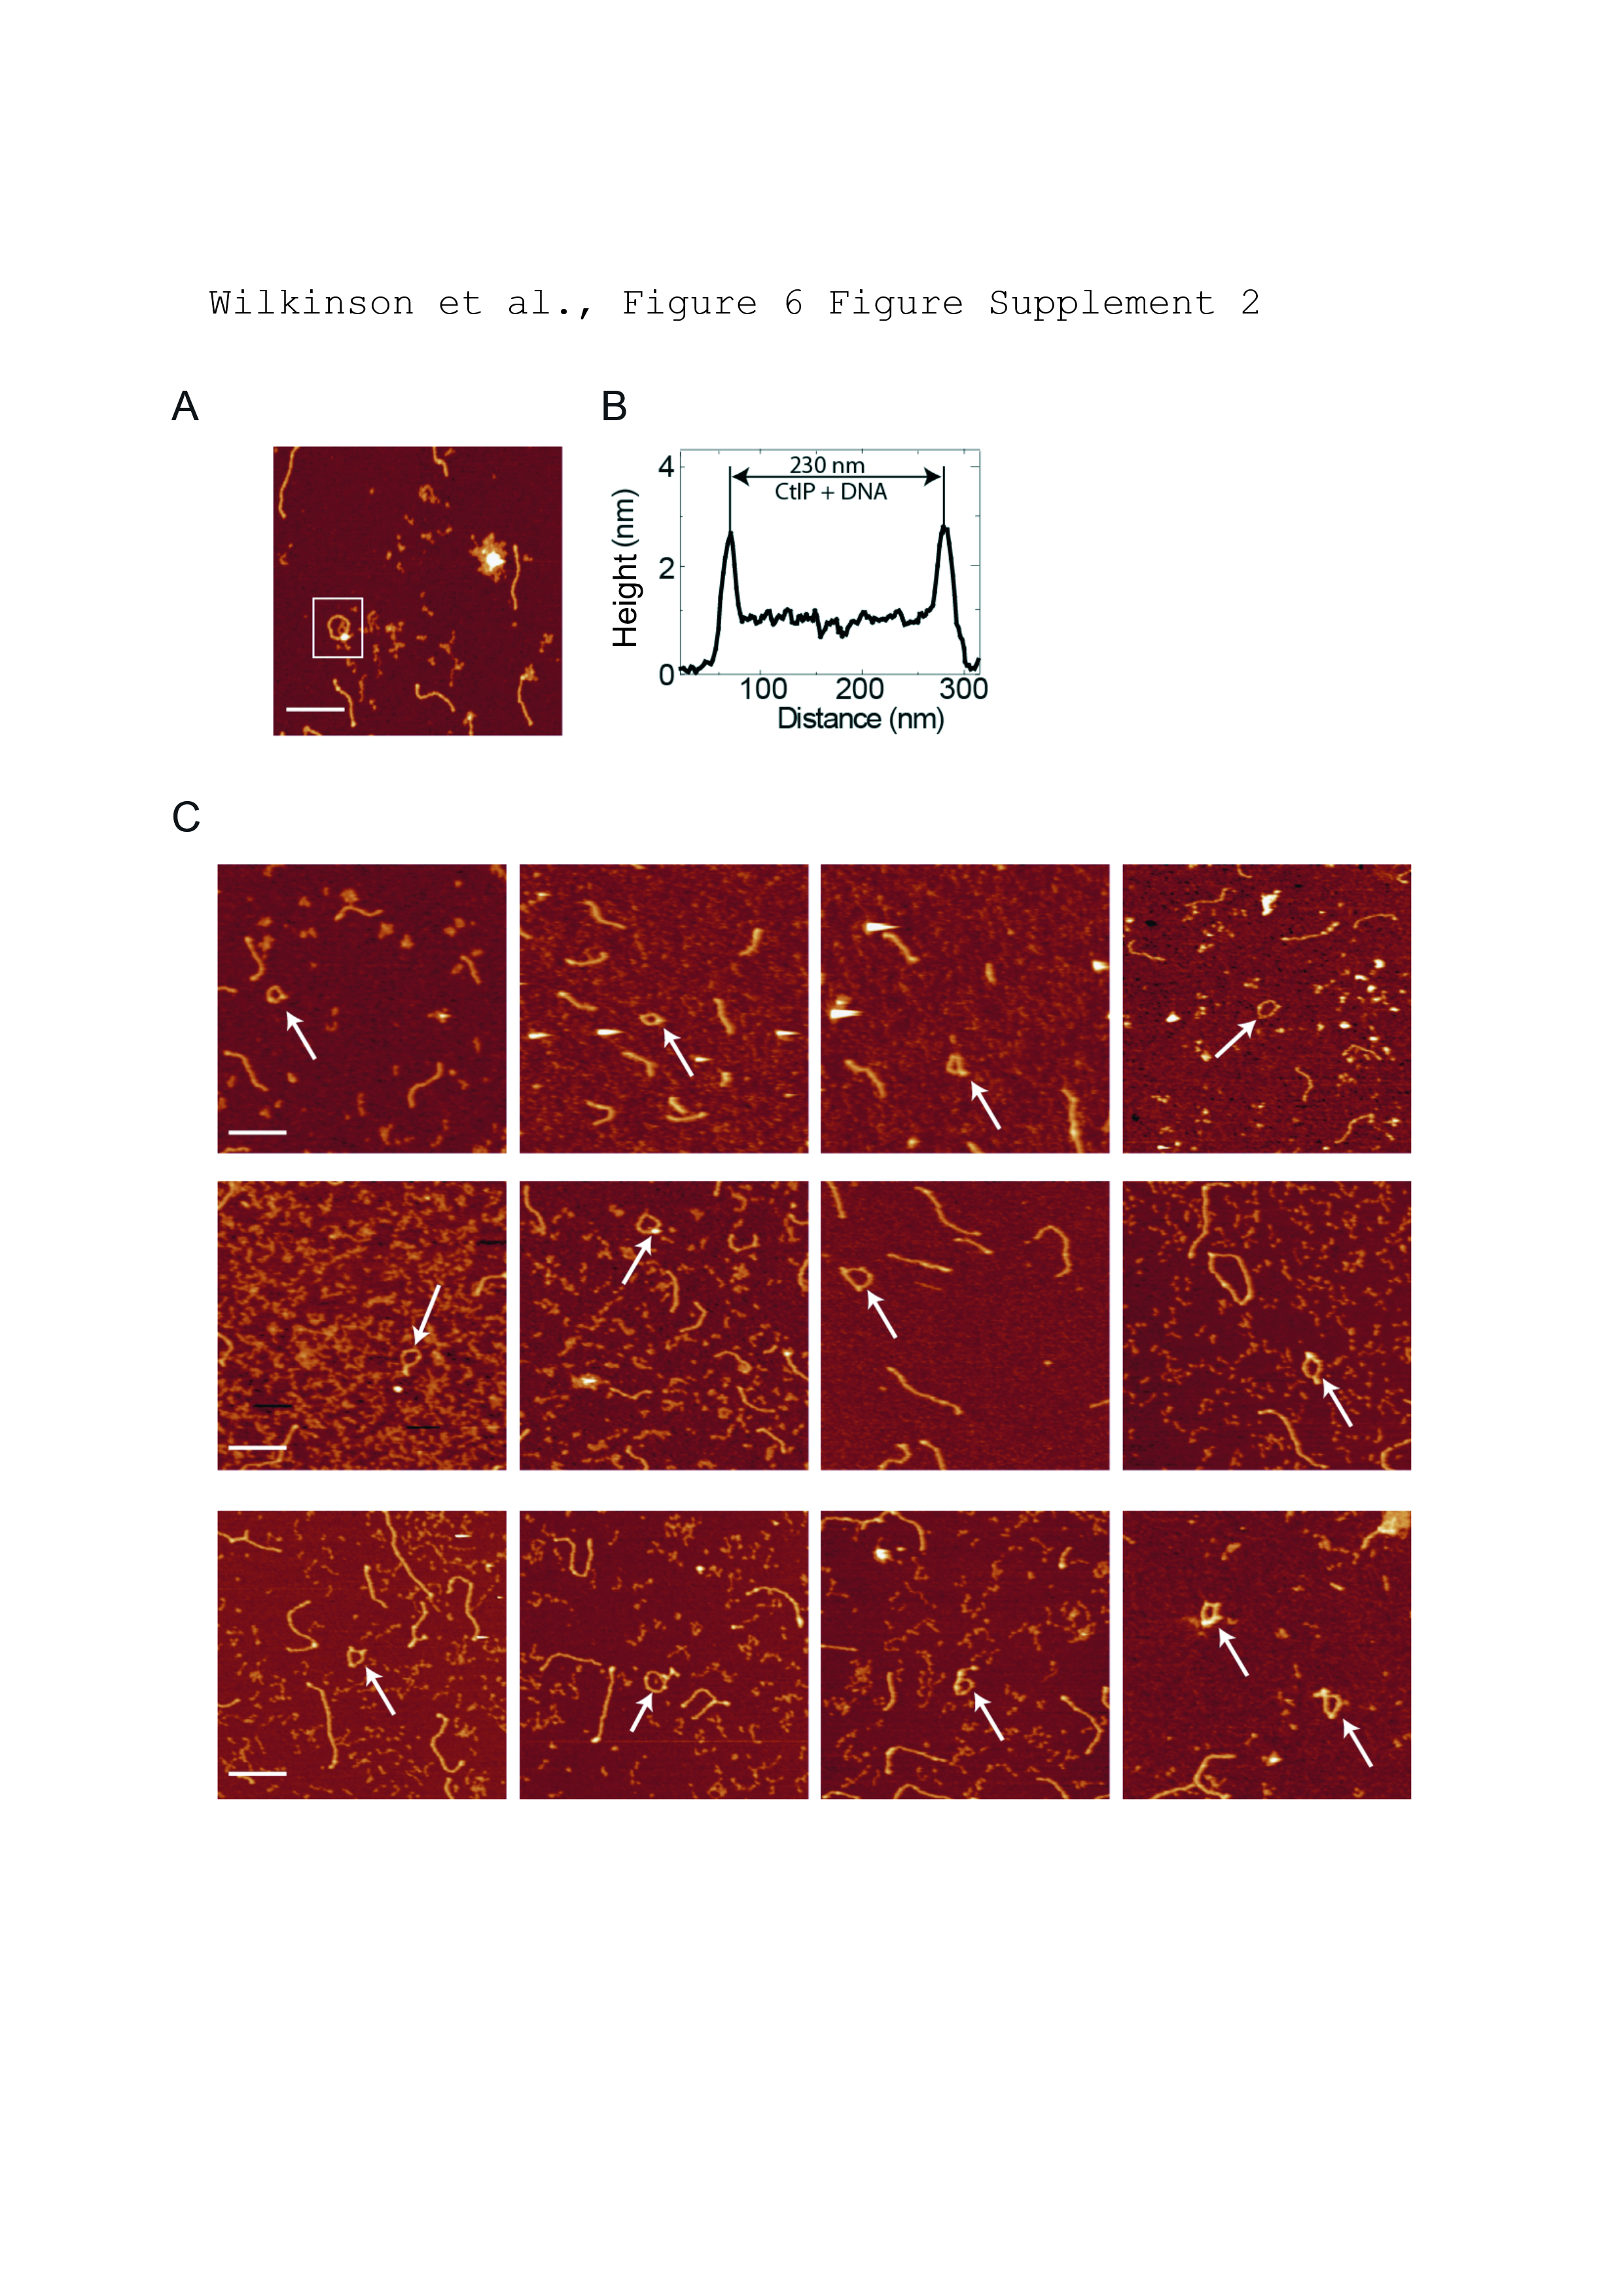

Supplement: supp [file elife-42129-supp-v1.zip › elife_poa_e42129_Figure_6_figure_supplement_2.jpg]

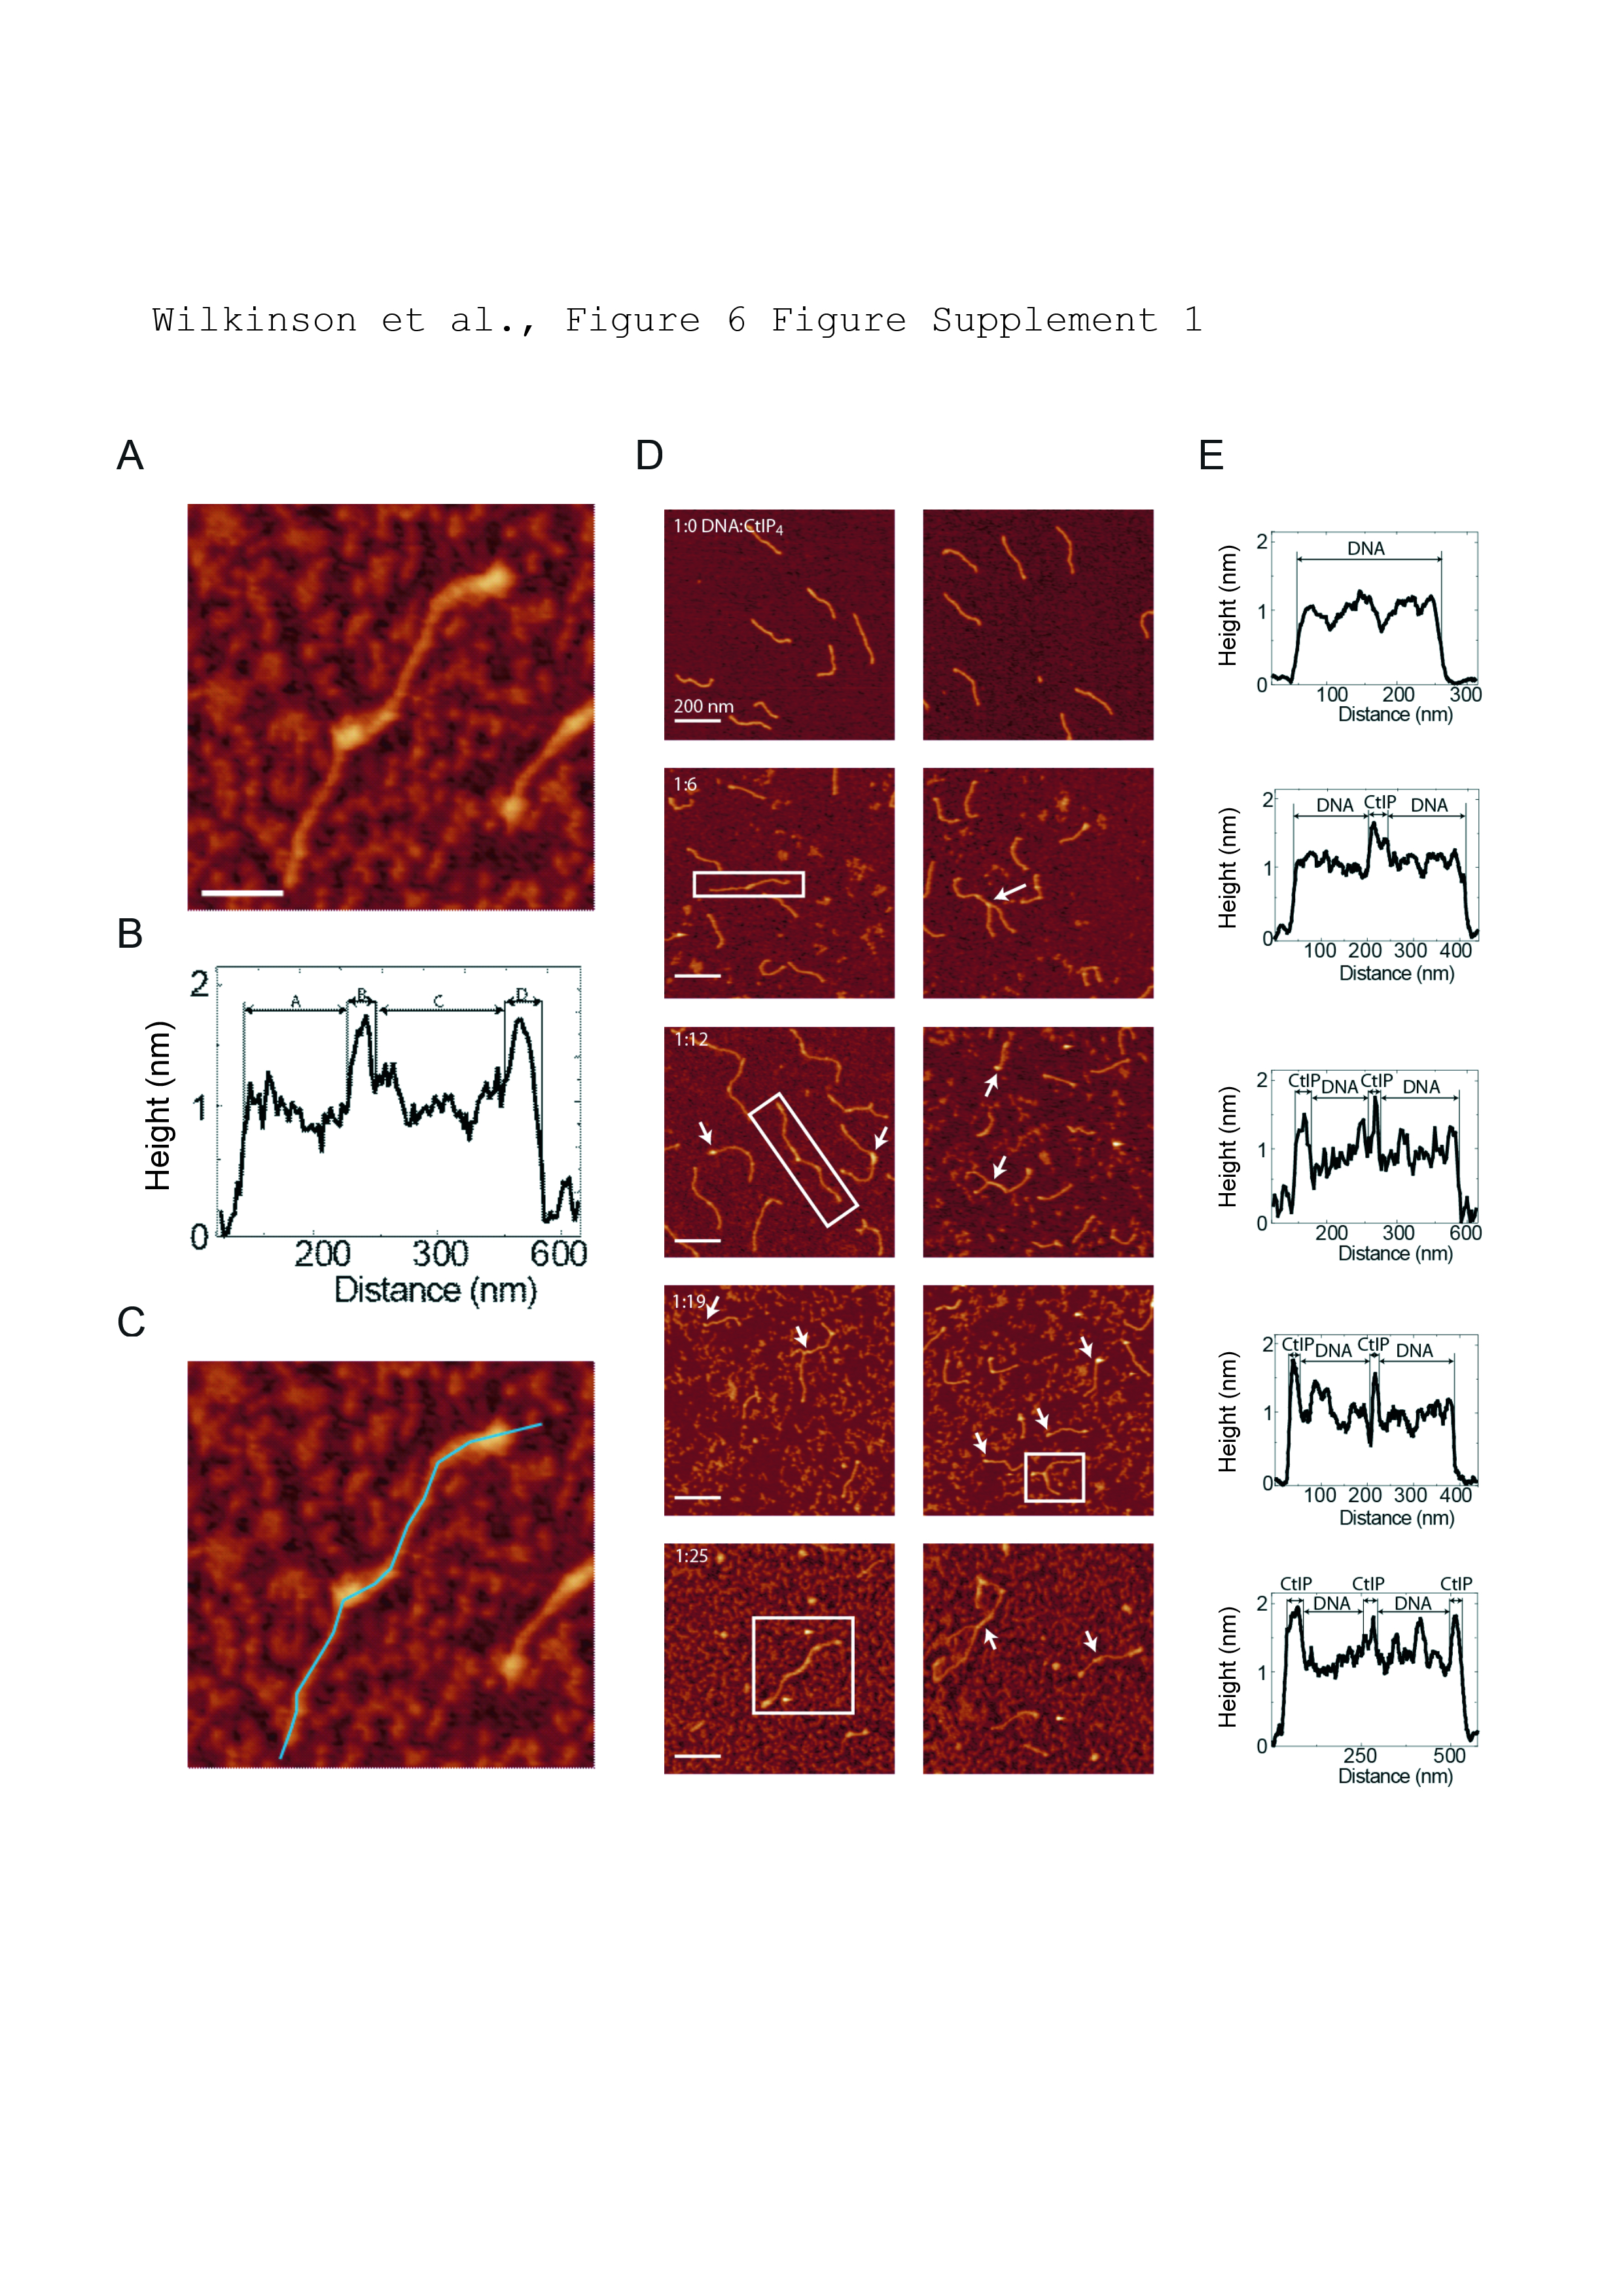

Supplement: supp [file elife-42129-supp-v1.zip › elife_poa_e42129_Figure_6_figure_supplement_1.jpg]
